# Supplementary material for: Detection of land surface induced atmospheric water vapor patterns
Source: Copernicus journal article supplement (doi:10.5194/acp-2019-322), 2019-05-07
Supplement: Supplementary file [file acp-2019-322-AC1-supplement.zip]

The authors would like to thank all three reviewers for their constructive and helpful comments. We are certain that by addressing and clarifying the issues mentioned by the reviewers, the quality of the revised manuscript has improved significantly. In the following we provide a detailed response to the **comments of all reviewers** together with the *changes in manuscript and where they occur*.

5

## **Reviewer #1: Wayne Angevine**

### **General comments:**

10 **1. The sort of patterns described here are, according to the literature, strongly wind-speed dependent. As far as I can tell, the wind speeds are not shown here. Does the strength of the patterns depend on the wind speed? There should be plenty of samples to support some binning of the data. See (and reference) the literature on "blending height."**

15 Beside looking for IWV pattern changes related to the wind direction, also the wind speed was taken into account, but no significant change in pattern strength during the course of the day was found. The median daily difference of maximum and minimum deviation from mean of the scan accounts for 1.1% for wind speeds below the median value of 5 m/s and 1.3% for wind speeds higher than the median.

20

Although, a change in the direction of the peaks due to wind speed and wind direction is evident, indicating a shift between the atmospheric water vapor pattern and underlying surface. This dependency is discussed in section 3.1 and an additional plot was added (Fig . 3):

25 *P. 9, l. 34: Separating all cases according to the low-level wind direction from the Doppler lidar, a directional dependence is found related to the wind speed. As an example, all MWR scans during northwesterly (270°-360°) winds are averaged separated by the median wind speed (5 m/s). Fig. 3 shows the highest positive deviations in the southwest direction for low wind speeds. For higher wind speeds this peak is shifted towards the southeast direction, indicating local transport and a*  
30 *shift of the MWR scanning beam and the underlying surface. The peak around 70° is not significantly changing, possibly due to a wind shading effect of the hill to the northeast. This dependency can also be seen for other wind directions. To exclude this process and to better connect the spatial IWV deviations with the surrounding land use, the following analysis is restricted to cases with wind speeds below the median value.*

35

According to the blending height literature (reference Sührling and Raasch (2013) added) the strongest influence of the heterogeneous surface is assumed to be present up to the top of the convective boundary layer, which is considered here.

40 **2. A related point: Mesoscale circulations are mentioned in the introduction. They turn out to be rare in real data, mostly because of the wind speed dependence mentioned above. This comes up again in the discussion of fig.6, see specific comment below. Please consider how to make this point more carefully.**

45 In the introduction, mesoscale circulations are mentioned as an example for larger scale effects of land surface influence, but they are difficult to observe with the instrument setting at JOYCE. Therefore the focus is more on smaller scale features.

P. 1, l. 18: *On a more local scale the transport of energy and water vapor into the atmosphere can trigger the formation of shallow convective clouds and precipitation (e.g. Rabin et al., 1990; Avissar and Schmidt, 1998).*

5

**3. The information content of radiometer measurements is usually rather small (at most a few pieces of information in a beam). When the humidity profile is "integrated up to a scaling height of 2.5 km," (p.7 line 2), how many pieces of information are actually included in the integral? How do you know where the height of 2.5 km is in the slant path profile?**

10

The degrees of freedom for signal (DFS) in the lowest 2.5 km are usually 1-2 for MWR humidity retrievals and do not show a significant increase for higher altitudes (Barrera-Verdejo et al. 2016). Therefore the highest information content can be found in the boundary layer. For the 90° (zenith) retrieval we identified 1.87 DFS (0.96 below 2.5 km) and for the 30° (slant path) retrieval 2.14 DFS (1.04 below 2.5 km). The height grid in the slant path profile is set in the forward modeling step of the retrieval derivation process in the same way as for the zenith retrieval.

15

*P. 4, l. 1: The degrees of freedom for signal (DFS) are usually between 1-2 for MWR humidity retrievals and the highest information content can be found in the boundary-layer. For the zenith retrieval 1.87 DFS and for the 30° (slant path) retrieval 2.14 DFS are identified.*

20

**4. Why were the changed land use types chosen in the ICON2 simulation? It is not clear to me that the simulation with these choices really clarifies the issues in question. For example, if the hypothesis is that the mined areas emit more water vapor than other land use types, changing them to water bodies is not necessarily the best way to test that. Bare water doesn't emit water vapor very efficiently compared to some crops, for example. Can you explain or justify better why you made these particular choices?**

25

The land use types are changed in a way that all types occur in both simulations without changing the scale of heterogeneity. In this domain, the highest fraction is covered with crop/grass land. This is changed to bare ground in order to achieve a significant difference in the partitioning of the turbulent surface heat fluxes. The mining areas could potentially be a source for water vapor in the case of strong irrigation. Since we don't have access to the irrigation times and amount, this can not be verified. For the LES model to some extent this effect is simulated by changing the land use type of the pit mines from bare soil to water.

30

*P. 13, l. 17: In a second simulation (ICON2), the land use types are changed according to Fig. 5(b) (crop/grass to bare ground, bare ground to water, urban to forest, forest to crop/grass and water to urban). In this way, a significant reconstruction in the spatial distribution of the land use types is achieved without changing the scale of heterogeneity and keeping all occurring types. Also the partitioning of turbulent surface fluxes is largely affected by changing crop/grass land to bare soil, but for the whole simulation time the domain averaged sum of latent and sensible heat only differs by around 10 W/m<sup>2</sup> between ICON1 and ICON2.*

40

45 **Specific comments:**

**1. p.1 line 15: "Compartments" is maybe not the best word here. "Interactions between the land surface and the atmospheric boundary layer..." would be better.**

50

This part has been changed according to the suggestion:

P. 1, l. 14: *Interactions between the land surface and the atmospheric boundary layer can have significant influences on the regional weather and climate.*

5 **2. p.13 line 4-5: I am not confident that there is really a secondary circulation here, or a roll structure. The quasi-linear features are present in both simulations, just a bit more clear in ICON2. If there is a roll structure, it's not necessarily related to the land use patches, rolls occur frequently even over homogeneous surfaces.**

10 The authors agree that there is no clear evidence for a secondary circulation in this particular case and this wording is removed from the article. The features are even present in larger domain and lower resolution simulations without topography and bare ground as the only land use type. But changing the land use types for the second simulation shows a clear effect on the evolution of the boundary layer and cloud formation in terms of timing and characteristics. This can be attributed to  
15 the resulting local changes in surface fluxes, wind speed (lower roughness length for bare ground) and hence water vapor transport.

P. 14, l. 20: *The streaks are also visible in simulations using a larger domain, lower resolution, no topography and only bare ground (not shown), but the position and strength is strongly altered by  
20 the topography and land use input.*

*In the ICON2 simulation the differences in surface properties and the size of the heterogeneous land use patches intensifies the vertical velocity streak structure, leading to a higher water vapor transport from the surrounding area into the updraft region and an earlier cloud formation.*

25

## **Reviewer #2: Anonymous Referee**

### **1. Outline the main concepts**

I miss a conceptual framework that described the water vapour concentration in the  
30 atmosphere, some notion of the scale of mixing in the horizontal and vertical and then connect these to the slant, integrated measurements of the MWR and land-use map.

**The LES could serve as a means to distinguish processes by switching them on/off.**

**A simplified budget equation would be a good anchor for the analysis:**

35

$$\frac{\Delta\langle q \rangle}{\Delta t} = \frac{1}{\rho L_v} \frac{\Delta LE}{h} + u \frac{\Delta\langle q \rangle}{\Delta x}$$

It shows the boundary layer humidity tendency as a function of a local source  
(evapotranspiration) and a non-local source (transport term) of humidity.  $h$  represents the  
40 boundary layer height.

**With the LES the two terms of the budget can be determined and evaluated separately. Also a run could be set-up with no local flux or no transport.**

We agree, that the LES in combination with several sensitivity studies and an extended analysis  
45 could serve as a tool to disentangle different processes and investigate the contributions to the budget equation at least for a specific case study. But in our opinion this would be a separate study on its own. The focus of the presented manuscript is on the unique long-term analysis of the MWR scans and its use to investigate land surface induced patterns. The carefully selected cases show in average a pattern that can be explained by local land surface influences and can be connected to the  
50 land use types around JOYCE. The case study with the ICON-LEM is added to introduce the

potential of the model and test its capability to assess the impact of a changing land surface on the development of the cloudy boundary-layer. A more detailed study on the budget and to disentangle different processes would of course be interested and could be part of future research. Details are given below in the answers to the specific questions.

5

**Next step would be to connect some sense of scale to this equation on what sort of surface area the local part of the budget is sensitive to as the MWR beam transverses the atmosphere horizontally and vertically at the same time. The blending height concept might be useful here. What is the meaning of the part of the MWR path that is above the boundary layer in terms of its relation with the underlying surface?**

10

The case selection for the long-term analysis of MWR scans aim at minimizing larger scale effects like advection of dry/wet air masses. In this way the MWR beam would be sensitive to a surface area determined by the size of convective eddies. Here, a height of 2.5 km and therefore a horizontal area of 4.3 km for the scans with 30° elevation is chosen to include the convective boundary-layer and allow for a sufficient information content of the MWR. Within this height the degrees of freedom for signal (DFS) is still 1.04 compared to the overall 2.14 DFS for the slant path retrieval.

15

*P. 4, l. 1: The degrees of freedom for signal (DFS) are usually between 1-2 for MWR humidity retrievals and the highest information content can be found in the boundary-layer. For the zenith retrieval 1.87 DFS and for the 30° (slant path) retrieval 2.14 DFS are identified.*

20

A height of 2-2.5 km, where land use changes between ICON1 and ICON2 are causing differences in the simulations, can also be seen in the domain averaged relative difference of specific humidity (Fig. 6). This is also in agreement with the LES study of Shao et al. (2013), finding an influence of land-surface heterogeneity well beyond the surface layer.

25

Based on the case study simulation and the limited vertical resolution of the MWR, finding a general blending height is difficult.

30

*P. 14, l. 5: The maximum height above ground, where changing the land use types has still a significant influence on model parameters, is around 2.3-2.5 km, which is visible for example in the domain averaged specific humidity difference (ICON1-ICON2) profile (Fig. 6). Above this height the large scale forcings are more dominant, which are the same for both simulations. The highest difference occurs in the CBL, which is in agreement with Sührling and Raasch (2013) showing that heterogeneous surface patterns extend throughout the CBL for simulated turbulent heat fluxes. Also Shao et al. (2013) found an influence of land-surface heterogeneity well beyond the surface layer using LES.*

35

**The difficulty the MWR measurements is that transport will always play some role and at some height the connection with the surface directly below will be at least partly lost. This must be discussed and a clear approach must be sketched on how to zoom, as much as possible, into the local influence on the measurements. Large, synoptic scale transport if important will likely affect the whole scanning region equally, but can local transport (within the scanning beam) lead to a shift between scanning beam and underlying surface?**

45

When sorting the MWR scans with respect to wind direction and speed, a change in the water vapor pattern is visible indicating a shift between the scanning beam and fluxes emerging from the underlying surface corresponding to the wind direction for high wind speeds. This is now shown exemplary for the northwest wind direction (Fig. 3), which is also occurring in the case study. As a

50

consequence, an additional filter based on wind speed is applied, excluding all cases with a wind speed above 5 m/s for the further analysis.

5 *P. 9, l. 34: Separating all cases according to the low-level wind direction from the Doppler lidar, a directional dependence is found related to the wind speed. As an example, all MWR scans during northwesterly (270°-360°) winds are averaged separated by the median wind speed (5 m/s). Fig. 3 shows the highest positive deviations in the southwest direction for low wind speeds. For higher wind speeds this peak is shifted towards the southeast direction, indicating local transport and a shift of the MWR scanning beam and the underlying surface. The peak around 70° is not*  
10 *significantly changing, possibly due to a wind shading effect of the hill to the northeast. This dependency can also be seen for other wind directions. To exclude this process and to better connect the spatial IWV deviations with the surrounding land use, the following analysis is restricted to cases with wind speeds below the median value.*

## 15 **2. Section 3.1:**

**To exclude advection you set an arbitrary limit to the humidity tendency (p7 lines18-25). Looking at the equation above it seems to make more sense to set a limit to the wind speed or look for synoptic weather patterns that go with low  $dq/dx$  (large scale high pressure situations). What is confusing is that 2 pages further on (p9 lines 11-12) you mention that you**  
20 **do an additional filtering on wind to rule out the transport? But supposedly you already filtered for this effect?**

We agree that setting a limit to the wind speed is meaningful to exclude advection. As discussed in the previous comment, a filter for wind speed is added, excluding all cases with a wind speed above  
25 5 m/s and the directional dependence is analyzed (Fig. 3).

**What is the reason to lump all the cases with no clouds and little advection into one figure which combines situations from beginning to end of the growing season (crop-fields changing from bare soil to green to yellow) over a period of years (dry, wet conditions all mixed).**  
30 **Wouldn't it make more sense to present here the case you will study with the LES as well and off-set it against the multi-year picture and/or a situation in which advection does play an important role?**

The general idea of the study was to identify situations when the surface shows the strongest effect on the moisture field. As a first proxy high advection situations were eliminated as during these the surface influence is low as for example shown by Steinke et al. (2019) by the reduction of the amplitude of the diurnal water vapor cycle. Different classifications (e.g. seasons) were applied, however, we did not succeed in identifying any significant changes in the patterns when sorting for these classes.  
40

*P. 7, l. 21: This excludes overcast situations and large scale advection of moist or dry air as during these the surface influence is low as shown by Steinke et al. (2019) by the amplitude reduction of the diurnal water vapor cycle.*

45 In addition to the plot showing the scan deviation for situations with the same wind direction as in the case study (Fig. 3), also the multi-year picture (Fig. 4a) is shown and compared to the single case results (Fig. 4b) in section 3.2.

Figure 2 is very busy. I suggest to separate the line plots from the surface plots. Also it Fig 2a is maybe easier to interpret if you plot it radially so it matches the scanning circle of Fig 1. In Fig1 you could indicate the 36 bins?

5 Thank you for the suggestion. Figure 2 now only shows the line plots. The dissipation rate surface plot was removed since it doesn't give additional information compared to the CBL height. The scan deviation is now plotted radially and only for the period of interest during daytime. In addition azimuth angle bins are included in Fig. 1.

10 **Most of the text on pages 8-10 is on technical interpretation of the figures (e.g. you find out that the data filtering leads you to focus on anticyclonic weather types and that the WD compares well between methods); but there is very little on the relation between the MWR reading and the influence of the surface.**

15 As suggested in the previous comment, Fig. 2 is reduced by only showing the line plots and Fig. 3 (now Fig. 4) is replaced by a radial plot showing the long-term and case study scan deviations of MWR and MODIS in order to focus more on the relation between the MWR reading and the influence of the surface described in section 3.2.

### 20 3. MODIS

**The MODIS section reads as an intercomparison exercise of MWR measurements against constructed, virtual MWR scans from the MODIS data. They agree well, which is nice but the MODIS data doesn't provide additional insides on the research question. Fig3b without the MODIS line would have provided the same information relevant to the connection between**  
25 **MWR and the surface. I suggest to leave this section out and move Fig3b to section 3.1.**

The MODIS product is used as an additional and independent measurement for assessing the spatial water vapor distribution and to exclude a possible bias in the MWR data due to interference. The findings presented here could also be valuable for further studies using the MODIS products for  
30 assessing spatial IWV differences, which is especially valuable for larger areas.  
This section is now shortened, Fig. 3a is removed and the MODIS result from Fig. 3b is compared to all MWR scans in section 3.2.

*P. 10, l. 15: For a comparison with an independent IWV measurement and to exclude that the*  
35 *patterns are influenced by interference, the MWR results are compared to the MODIS-NIR derived IWV around JOYCE. The findings presented here could also be valuable for further studies using the MODIS products for assessing spatial IWV differences, which is especially valuable for larger areas.*

### 40 4. LES

**See final comment under point 1. The LES gives you the tool to investigate the relative importance of local influence vs transport under various conditions.**

See discussion of final comment under point 1.

45 **I am not sure what the “inverted” landuse map teaches us. The MWR profile looks roughly the same (Fig 5) and moisture and cloud fields show similar patterns albeit with different intensity. Is it fair to conclude that the advection and topography are more important than landuse?**

50

The land use types are altered to achieve a strong change in the partitioning in surface heat fluxes and in a way that all types occur in both simulations.

We agree that in general advection and topography are more important, but here the intention was to identify the impact of the land use for low advection cases. Drawing conclusions on local water vapor patterns as done for the long-term MWR analysis is difficult on the basis of a single simulated day as it was visible from Fig. 5. Although a clear impact of the drastic land use change together with the topography is seen with respect to the evolution of the boundary layer and the formation of clouds. Therefore we focus now on the measured water vapor deviations by MWR and MODIS in section 3.2 and on the impact of the land use types on the development of the cloudy boundary-layer in section 4.

*P. 13, l. 9: In order to make a general statement whether the ICON-LEM is correctly representing the spatial water vapor distribution, several high resolution simulations would be needed. Here, the focus is on assessing the impact of different land use data as input for the model on boundary-layer development and cloud formation.*

#### **Minor issues:**

**1. Lines 11-12; Change “which was used in addition to investigate changes in surface fluxes and the water vapor and cloud field for an altered land use input.” to “which was used to investigate changes in surface fluxes and the water vapor and cloud fields for an altered land use input.”**

The text was modified incorporating the suggestion:

*P. 1, l. 10: In addition, high resolution large-eddy simulations (LES) are used to investigate changes in the water vapor and cloud fields for an altered land use input.*

**2. Line 10 (and corresponding reference in the literature list): “Guerau de Arellano (2008)” should be “Vilà-Guerau de Arellano (2008)”**

The reference was changed accordingly.

#### **Reviewer #3: Anonymous Referee**

**Page 1, Lines 15 and 22: Is "compartments" the correct word? Components might be better. The the word could be removed from Line 15. In line 22 it could be replaced with “the surface” or something similar.**

The word "compartments" has been removed:

*P. 1, l. 14: Interactions between the land surface and the atmospheric boundary layer can have significant influences on the regional weather and climate.*

*P. 1, l. 21: This requires assumptions near the surface boundaries, which strongly affects exchange processes.*

**Page 2, Lines 1-2: I am not familiar with the Transregional Collaborative Research Center 32 (TR32) Patterns in Soil-Vegetation-Atmosphere Systems, or how it might be important be in the context of this study? Some additional explanation would be helpful.**

5 This study was conducted within the framework of the Transregional Collaborative Research Center 32 (TR32). This statement together with the scope of TR32 is added to the text.

10 *P. 2, l. 1: The scope of TR32, as described in Simmer et al. (2015), is to improve the understanding and prediction capabilities of the spatiotemporal evolution of the terrestrial system across scales using measurement techniques and modeling platforms by integrating activities of several research groups.*

**Page 2, Lines 5-6: What is meant by high-resolution? Isn't LES by definition high-resolution compared to the scales of the flow?**

15 The authors agree that LES implies a high grid resolution to resolve turbulence and clouds. Although there are large differences in model resolution between different LES models and even within a single model, depending on the setup, ranging from 10-100 m (used in this study and referred to as high-resolution) to 100-200 m (usually used for larger domains).

20 **Page 3, Line 31: Do the years used in this study include a mix of relatively dry and wet years?**

25 The data used in this study covers five years. At this site the average year-to-year variability in terms of humidity is rather small, but still a good coverage of relatively dry and wet years was achieved in this study. As an exemplary measure, the mean zenith IWV taken around the selected scans for each year ranges from 15.2 kg/m<sup>2</sup> to 19.7 kg/m<sup>2</sup>. The variability of the zenith IWV values for the different years (4.1-7.2 kg/m<sup>2</sup>) is in the range or higher than changes in the mean value.

30 *P. 8, l. 3: At JOYCE the average year-to-year variability in terms of humidity is rather small, but still a good coverage of relatively dry and wet years is achieved in this study. As an exemplary measure, the mean zenith IWV taken around the selected scans for each year ranges from 15.2 kg/m<sup>2</sup> to 19.7 kg/m<sup>2</sup>. Therefore the variability of the zenith IWV values for the different years (4.1-7.2 kg/m<sup>2</sup>) is in the range or higher than changes in the mean value.*

35 **Page 4, Line 1: The text states that linear interpolation is used for missing values. Is this treatment an issue if you are concerned about the details of the spatial pattern in the boundary layer?**

40 Since these single scanning directions are not connected, which would create a larger gap, we are assuming a smooth transition at the gaps. Therefore excluding single azimuth directions due to interference and using linear interpolation is not causing an issue in this case.

45 *P. 4, l. 7: Since the excluded azimuth directions are not connected, no larger gap is apparent and a smooth transitions between the gaps can be assumed. Therefore the missing IWV values are filled using a linear interpolation.*

**Page 4, Lines 18 and 19: The text states that the TKE dissipation rate is based on variance of the mean Doppler velocity. It would be helpful to have a few additional words about how the threshold is applied. Is it a threshold of dissipation, variance, or something different?**

50



The threshold based approach for determining the CBL height using the TKE dissipation rate, as described in Manninen et al. (2018), finds the last range bin in each profile with significant turbulence in a bottom-up approach. This is now clarified in the text.

5 *P. 4, l. 25: The TKE dissipation rate is based on the variance of the observed mean Doppler velocity and allows for a threshold based estimation of the convective boundary-layer (CBL) height by determining the last range bin in each profile with significant turbulence in a bottom-up approach.*

10 **Page 5, Line 14: It feels like there are some key aspects of the model configuration that are not covered in this section. For example, what data set is used for initial and boundary conditions or are they assumed to be periodic? These simulations could also be sensitive to the treatment of the land surface. It would be helpful to the reader to have some discussion of these important aspects.**

15

The model is forced with ECMWF Integrated Forecasting System (IFS) data, which includes initial and lateral boundary conditions (so non-periodic).

As the IFS and the ICON model don't use an identical land surface model, we cannot exclude that the simulations are sensitive against the treatment of soil moisture and other land surface

20 components. But those sensitivities are the same for both simulations and a model simulation will always be sensitive to the setup - including domain size, resolution, forcing data, simulation time etc. But so far sensitivity studies implicate, that the results are rather robust despite small variations.

25 *P. 6, l. 2: As the IFS and the ICON model are not using an identical land surface model, a sensitivity of the simulations against the treatment of soil moisture and other land surface components can not be excluded. But those sensitivities are the same for both simulations and sensitivity studies implicate, that the results are rather robust despite small variations.*

**Figure 1: How does this domain compare to domain used by the ICON-LEM?**

30

The domain of the land use type classification shown in Fig. 1 covers the main part of the ICON-LEM domain (10 km radius domain size) shown in Fig. 6 (now Fig. 7).

35 **Page 7, Lines 4-5: The text states “The main crop types between April and September are. . .”. Isn’t it important to differentiate between these various plant types that could have very different transpiration rates and how they are represented in the land-use/land-cover data set??**

40 One has to note that the region is characterized by many small field with sizes of only a few 100 m (see Fig. 1). Due to crop rotation the different crop types change from year to year and a rather random pattern of sugar beet and winter wheat fields next to each other can be found. Therefore, as no larger continuous areas of individual crop types occur, differences between these can not be resolved using the MWR.

45 *P. 7, l. 13: Due to this crop rotation and regarding the small field sizes in this domain, no further distinction in crop types is made.*

**Page 7, Line 20: The sentence “The first and last scan of each sequence is neglected. . .” seems to contradict the previous one.**

50

A sequence of at least three consecutive scans fulfilling the criteria are required to be included in the analysis. The beginning and ending of each sequence is neglected to ensure that they are not part of a transition from conditions violating the criteria.

5 *P. 7, l. 30: The first and last scan of each sequence is neglected to ensure that they are not part of a transition from conditions violating the criteria.*

10 **Page 7, Line 26-34: The scan frequency of the MWR is likely much slower than the time scales of the turbulence. Thus, the data that is shown won't be able to resolve individual thermals. Is this a potential shortcoming, or does is the point to the need look at features with longer temporal scales?**

15 Due to the scanning frequency the individual thermals, which are assumed to resemble the ensemble of thermals, transporting water vapor can not be detected with this method. Therefore we were aiming at detecting signals that are present in a composite of MWR scans as shown in section 3.2.

20 **Page 7, Line 29: I do not entirely understand the sentence “. . .was found as mean value for the zenith MWR measurements. . .”. It seems to indicate that the hourly mean value of IWV was determined based on 1 scan, but it seems that there should be additional scans in each hour-interval based on the text in section 2.1.**

25 Here we only refer to the height, where the humidity profile drops below  $1/e$ . This height was found by averaging the  $1/e$  heights from all zenith measurements of the MWR 1 h around the scans, which have a temporal resolution of 1-2 seconds.

*P. 9, l. 1: This height, where the humidity profile drops below  $1/e$ , was found by averaging the  $1/e$  heights from all zenith measurements of the MWR within 1 h around each of the selected scans.*

30 **Page 10, Line 11: Some additional detail of how the virtual MWR scan is derived would be helpful as the details are not clear to me.**

35 The MODIS derived IWV is converted into a absolute humidity profile for each pixel assuming a linear decrease (by 20%) in the boundary-layer and an exponential decrease above. The mean CBL height is determined by the Doppler lidar and the  $1/e$  height for the exponential decrease is derived from the MWR humidity profiles 1 h around the corresponding overpasses. This section is now updated with more details.

40 *P. 11, l. 1: Therefore the total IWV is distributed to an absolute humidity profile for each MODIS pixel assuming a linear decrease by 20% in the CBL and an exponential decrease above similar to Schween et al. (2011). The mean CBL height is determined from the Doppler lidar based boundary-layer classification Manninen et al. (2018) around 1 h of each overpass.*

45 **Page 10, Lines 13- 14: Why not use the boundary-layer height derived from the Doppler lidar?**

The boundary-layer classification is based on the Doppler lidar as described in section 2.2. For clarification, this is now repeated in this part.

P. 11, l. 3: The mean CBL height is determined from the Doppler lidar based boundary-layer classification Manninen et al. (2018) around 1 h of each overpass.

5 **Page 11, Line 1: I believe that this is the first time that irrigation is mentioned in the manuscript. Is this a regular occurrence? Should it be mentioned earlier?**

Irrigation in the pit mines, in contrast to no irrigation for the crop fields, is a potential source for water vapor, but there is no information available on the timing and amount of irrigation in this area, which makes it difficult to quantify. Therefore it is only briefly mentioned.

10

**Page 11, Lines 14-15: The text highlights differences in the observed and simulated boundary-layer depth. Why not just normalize the results using common boundary-layer scales? Maybe there isn't sufficient data?**

15 The exact height of the boundary layer is difficult to compare between one model simulation and observations due to different methods used to define it and using common boundary-layer scales would indeed require more data.

20 **Figure 5: Could more tick marks be added to the horizontal axis of Figure 5? Maybe one every 45 or 90°?**

The water vapor deviation derived from the scans are now represented as polar plots to allow for a better comparison with the surrounding land use and topography shown in Fig 1.

25 **Page 12, Lines 6-9: The text states "Also a more dominate large scale humidity. . .". This sentence argues for some additional discussion of the boundary-conditions use to drive the model.**

30 This sentence was removed since drawing conclusions on local water vapor patterns as done for the long-term MWR analysis is difficult on the basis of a single simulated day as it was visible from Fig. 5. Although a clear impact of the drastic land use change together with the topography is seen with respect to the evolution of the boundary layer and the formation of clouds. Therefore we focus now on the measured water vapor deviations by MWR and MODIS in section 3.2 and on the impact of the land use types on the development of the cloudy boundary-layer in section 4.

35

*P. 13, l. 9: In order to make a general statement whether the ICON-LEM is correctly representing the spatial water vapor distribution, several high resolution simulations would be needed. Here, the focus is on assessing the impact of different land use data as input for the model on boundary-layer development and cloud formation.*

40

**Figure 6: Over what depth was the vertical averaging applied?**

The vertical averaging was applied to the whole column. This is now changed to the lowest 2.5 km to show that the structures emerge from the boundary layer. This statement is also added to the text:

45

*P. 14, l. 12: In order to elaborate the details of different boundary-layer and cloud development, the spatial fields of height and time averaged vertical velocity and integrated humidity up to 2.5 km (IWV\_2.5) are analyzed (Fig. 7).*

50 and the caption of Fig. 6 (now Fig. 7):

ICON-LEM vertically averaged vertical velocity (top) and integrated humidity (bottom) up to 2.5 km of the ICON1 (a,c) and ICON2 (b,d) simulations.

5 **Page 13, Lines 4-6: Are the roles really a secondary circulation associated with the different amounts of moisture or are they simply a response to overall forcing in this particular case study? Back-of-the envelop calculations could be completed and compared to thresholds that have appeared in the literature.**

10 The authors agree that there is no clear evidence for a secondary circulation in this particular case and this wording is removed from the article. The features are even present in larger domain and lower resolution simulations without topography and bare ground as the only land use type. But changing the land use types for the second simulation shows a clear effect on the evolution of the boundary layer and cloud formation in terms of timing and characteristics. This can be attributed to  
15 the resulting local changes in surface fluxes, wind speed (lower roughness length for bare ground) and hence water vapor transport.

P. 14, l. 20: *The streaks are also visible in simulations using a larger domain, lower resolution, no topography and only bare ground (not shown), but the position and strength is strongly altered by  
20 the topography and land use input.*

*In the ICON2 simulation the differences in surface properties and the size of the heterogeneous land use patches intensifies the vertical velocity streak structure, leading to a higher water vapor transport from the surrounding area into the updraft region and an earlier cloud formation.*

25 **Page 14, Line 1: Is the change mentioned here associated with the intensity of the roles, or is it related to some other aspect of the flow?**

The change mentioned here refers to the enhanced vertical water vapor transport in the southeast part of the domain, where stronger updrafts and an increased mixing layer height can be observed  
30 compared to the reference simulation.

P. 14, l. 31: *With higher wind speeds and a higher fraction of bare ground the domain averaged sensible heat flux (between 11-18 UTC) in ICON2 is increased by 28.72 W/m<sup>2</sup> and the CBL grows deeper (by about 30 m) especially in the southeastern part of the domain.*  
35

**Page 14, Line 8: It would be clearer to use "larger" rather than "higher" in this sentence.**

"higher" is replaced by "larger"

40 P. 14, l. 33: *On the other side the specific humidity in ICON1 is significantly larger in the CBL (Fig. 6) and clouds grow taller compared to the ICON2 simulation (Fig. 8), which is connected to an increased latent heat flux by 86.04 W/m<sup>2</sup> in ICON1 due to more vegetated areas.*

45 **Page 14 Line 10: Does the sum of the sensible and latent heat fluxes differ in the two simulations? It's hard to tell from Figure 7, and it could impact the interpretation of the results.**

50 For a domain average between 11-18 UTC, the sum of latent and sensible heat is 57.85 W/m<sup>2</sup> higher in ICON1 (86.04 W/m<sup>2</sup> higher latent heat flux in ICON1 and 28.72 W/m<sup>2</sup> higher sensible heat flux in ICON2). For the whole simulations the fluxes only differ by around 10 W/m<sup>2</sup>.

P. 13, l. 3: *Also the partitioning of turbulent surface fluxes is largely affected by changing crop/grass land to bare soil, but for the whole simulation time the domain averaged sum of latent and sensible heat only differs by around 10 W/m<sup>2</sup> between ICON1 and ICON2.*

5

**Page 15, Line 3: Should "in" be "over" or some other word?**

"in" is replaced by "spanning"

10 P. 16, l. 2: *Long-term observational evidence of this interaction spanning scales of a few kilometers is still lacking.*

**Page 15, Line 6: Should "also" be added between "is" and "attributed"?**

15 The word "also" was added to the text.

P. 16, l. 5: *The atmospheric water vapor pattern can only partly be explained by the large-scale driven advection and is also attributed to the local transport of water vapor from the surface, especially during convective scenes.*

20

**Page 15, Line 16: "Are" should be "were".**

"are" is replaced by "were"

25 P. 17, l. 1: *In a comprehensive case study, large-eddy simulations by the high resolution ICON-LEM model were carried out to further assess the impact of the land surface on the development of the cloudy boundary-layer.*

30 **Page 15, Line 19: Is this really a mesoscale circulation, or is it smaller scale? Note that there was also a comment in section 3.3 regarding the changes in the winds and the nature of the changes in the boundary-layer flow. Would it be more accurate to simply say that there are changes in the boundary-layer flow structures?**

Please see the discussion to the previous comment on Page 13, Lines 4-6.

# Detection of land surface induced atmospheric water vapor patterns

Tobias Marke<sup>1</sup>, Ulrich Löhnert<sup>1</sup>, Vera Schemann<sup>1</sup>, and Susanne Crewell<sup>1</sup>

<sup>1</sup>Institute for Geophysics and Meteorology, University of Cologne, Germany

**Correspondence:** Tobias Marke tmarke@meteo.uni-koeln.de

**Abstract.** Finding observational evidence of land surface atmosphere interactions is crucial for understanding the spatial and temporal evolution of the boundary layer, as well as for model evaluation, in particular large-eddy simulation (LES) models. In this study, the influence of a heterogeneous land surface on the spatial distribution of atmospheric water vapor is assessed. Ground-based remote sensing measurements of a scanning microwave radiometer (MWR) are used in a long-term study over  
5 six years to characterize spatial heterogeneities in integrated water vapor (IWV) during clear sky conditions at the Jülich Observatory for Cloud Evolution (JOYCE). The resulting deviations from the mean of the scans reveal a direction-dependent IWV that is visible throughout the day. Comparisons to a satellite derived spatial IWV distribution show a good agreement for a selection of ~~61~~ satellite overpasses during convective situations. With the help of a land use type classification and information on the topography, the main type for the regions with a positive IWV deviation was determined to be agricultural fields and  
10 nearby open pit mines. Negative deviations occurred mainly above elevated forests and urban areas. ~~The observational results are in agreement with a~~ In addition, high resolution large-eddy ~~simulation simulations~~ (LES) ~~, which was used in addition are used~~ to investigate changes in ~~surface fluxes and~~ the water vapor and cloud ~~field fields~~ for an altered land use input.

*Copyright statement.*

## 1 Introduction

15 Interactions between ~~compartments of the~~ land surface and the atmospheric ~~boundary-layer~~ boundary layer can have significant influences on the regional weather and climate. Heterogeneity in land use, among other parameters characterized by soil type, vegetation and urban areas, induces spatial variability in surface fluxes of momentum, sensible and latent heat. Numerical studies suggest, that contrasts in land surface fluxes are responsible for mesoscale circulations and considerably affect the state of the atmospheric boundary-layer in a non-linear way (e.g. Ookouchi et al., 1984; Pielke et al., 1991; Clark and  
20 Arritt, 1995). ~~Furthermore~~ On a more local scale the transport of energy and water vapor into the atmosphere can trigger the formation of shallow convective clouds and precipitation (e.g. Rabin et al., 1990; Avissar and Schmidt, 1998). Because this small scale variability can not be resolved by most weather forecast and climate models, it needs to be parameterized. This requires assumptions near ~~compartment the surface~~ boundaries, which strongly affects exchange processes. Unresolved patterns in the models are crucial, since the resulting gradients directly influence the fluxes and hence the evolution of the model

state (Simmer et al., 2015). Monitoring and modeling these spatial patterns and ~~compartment~~-interactions is the main focus of this study, which is ~~related to~~ conducted within the framework of the Transregional Collaborative Research Centre 32 (TR32) "Patterns in Soil-Vegetation-Atmosphere Systems" (www.tr32.de). The scope of TR32, as described in Simmer et al. (2015), is to improve the understanding and prediction capabilities of the spatiotemporal evolution of the terrestrial system across scales using measurement techniques and modeling platforms by integrating activities of several research groups.

Since the scales of surface heterogeneity and resulting interaction processes with the overlying boundary-layer are in the order meters to kilometers, a frequently used tool for studying these interaction processes on a local scale is conducting high resolution large-eddy simulations (LES) (e.g. Courault et al., 2007; Huang and Margulis, 2009; Maronga and Raasch, 2013; Shao et al., 2013). By altering the land surface properties, the turbulence resolving simulations provide estimates of the resulting effect on the boundary-layer structure. In this way Vilà-Guerau De Arellano et al. (2014) found differences in cloud dynamics that can be related to the partitioning of the surface fluxes determined by the plant functional type. In van Heerwaarden and Vilà-Guerau De Arellano (2008) an enhancement of cloud formation over heterogeneous landscapes using different Bowen ratios is indicated.

For a better understanding of the influence of the land surface on the atmospheric state and in order to evaluate model findings, ground-based observations by current state-of-the-art remote sensing instrumentation can be used. Significant effects of heterogeneous land use on the turbulent fluxes and connections to clouds have been shown in several field campaigns in a short-term perspective (Weckwerth et al., 2004; Beyrich et al., 2006; Wulfmeyer et al., 2011; Späth et al., 2016; Macke et al., 2017; Wulfmeyer et al., 2018). Investigating the influence of land use heterogeneity on boundary-layer characteristics, such as water vapor and clouds, from long-term measurements can play a key role in finding systematically significant patterns in relations between the local land surface and atmosphere above.

As a key parameter that connects vegetation activity and the boundary-layer, the atmospheric water vapor plays an important role within the hydrological cycle, but also for the energy balance at the surface and within the atmosphere. Späth et al. (2016) investigated water vapor fields for a limited amount of time in a campaign with a scanning differential absorption lidar and found gradients related to surface elevation and land cover type. But also long-term studies of the spatiotemporal variability of water vapor already revealed terrain-related processes in a mountainous area (Adler et al., 2016) by using scans of a passive ground-based microwave radiometer (MWR). Compared to the widely used satellite observations for spatially resolved water vapor estimates, available only for a handful of overpasses per day, the MWR is well suited for continuous and temporally highly resolved measurements at a certain location. While MWR profile measurements of humidity suffer from a coarse resolution, a good agreement between zenith measurements of integrated water vapor (IWV) using MWR, satellite and Global Positioning System (GPS) observations was shown in Steinke et al. (2015). Also, the MWR has already proven to be able to detect horizontal humidity gradients by retrieving IWV values in a scanning configuration (Kneifel et al., 2009; Schween et al.,

2011).

To address the question whether spatial water vapor distributions can be connected to land surface properties, this observational and modeling study focuses on the long-term pattern of azimuthal IWV deviations derived from satellite and ground-based measurements at the Jülich Observatory of Cloud Evolution (JOYCE, Löhnert et al. (2015)) in Western Germany (50.91°N, 6.41°E). At JOYCE, various remote sensing instruments, including a scanning MWR, are deployed since 2011 to continuously monitor water vapor, clouds and precipitation. For comparing the spatial IWV distribution derived from the MWR with an independent measurement, a satellite water vapor product is used at high spatial resolution. In addition, a Doppler wind lidar is available for a characterization of the atmospheric boundary-layer in terms of the winds and turbulent mixing processes that control the exchange of water vapor between the surface and the atmosphere. The impact of the land surface on the atmospheric water vapor distribution is evaluated by the comparison of the derived IWV deviations to a detailed land use map. To better understand ~~which process explains the observed water vapor anomalies~~ the impact of the land surface on the evolution of the cloudy boundary-layer, sensitivity studies with high resolution LES are performed with different land use type settings.

15

The ~~description details~~ of the utilized instruments and data of this study in Sect. 2 is followed by the ~~analysis of the IWV deviations obtained from~~ description of the data sample derivation used in the long-term ~~MWR scans, selected during clear-sky conditions (Sect. 3.1)~~ analysis. For a better description of the state of the boundary-layer during clear-sky conditions and large scale effects, the results are ~~presented shown~~ together with wind and turbulence statistics derived from Doppler lidar measurements during the MWR scans and a reanalysis product (Sect. 3.1). Subsequently, the IWV deviations derived from MWR scans and ~~satellite observations are compared~~ for a collection of ~~overpasses satellite overpasses are compared~~ (Sect. 3.2). ~~A case study comparing the satellite and ground-based results~~ Also the dependence on wind direction and wind speed is presented together with a single case. A model case study is complemented by the analysis of two large-eddy simulations focusing on the land use influence on the ~~atmospheric water vapor evolution of the cloudy boundary-layer~~ (Sect. 3.34) and a summary of the results is given in Sect. 4.5.

25

## 2 Instruments and data

### 2.1 Microwave radiometer

The microwave radiometer HATPRO (Humidity And Temperature PROfiler) at JOYCE utilizes direct detection receivers and measures the brightness temperatures (TB) at 7 channels in the K-band from 22 GHz to 32 GHz and at 7 channels also in the V-band from 52 GHz to 58 GHz. In this study, the observations of the 7 K-band channels with a 1–2 s temporal resolution are taken into account. A statistical approach based on a least squares linear regression model (Löhnert and Crewell, 2003) is applied to derive IWV, absolute humidity (q) and liquid water path (LWP) using observations of the downwelling microwave radiance along the water vapor absorption line between 22.24 and 27.84 GHz and in the atmospheric window at 31.4 GHz.

30



The instrument is capable of observing in high temporal resolutions (Rose et al., 2005) and the absolute error in zenith TB measurements of 0.5 K is mainly determined by the instrument absolute calibration (Maschwitz et al., 2013). This accuracy converts into an uncertainty of 0.5–0.8 kg m<sup>-2</sup> in the derived IWV and 20–30 g m<sup>-2</sup> for LWP.

5 The zenith measurements (IWV<sub>z</sub>) alternate with full azimuth scans in 10° steps at 30° elevation angle. The degrees of freedom for signal (DFS) are usually between 1–2 for MWR humidity retrievals and the highest information content can be found in the boundary-layer. For the zenith retrieval 1.87 DFS and for the 30° (slant path) retrieval 2.14 DFS are identified. The scans are available between June 2012–June 2015 and starting from June 2018. In 2016 and 2017 no MWR scans were performed. The scanning frequency is 15 min and is increased to 10 min between 25 June and 18 July 2018 and decreased to  
10 30 min after 18 July 2018. Due to directional dependent interference in the unprotected 26.24 GHz channel, specific azimuth directions are not considered (50°, 160°, 180°, 260°) ~~and missing~~. Since the excluded azimuth directions are not connected, no larger gap is apparent and a smooth transitions between the gaps can be assumed. Therefore the missing IWV values are filled using a linear interpolation. For all scans, the derived values for LWP, IWV and q are air-mass corrected to account for the slant angle of the scanning MWR.

15

## 2.2 Doppler lidar and boundary-layer classification

As a pulsed lidar system, the Halo Photonics Streamline Doppler lidar (Pearson et al., 2009) provides range-resolved profile measurements of radial Doppler velocity and backscattered signal. With a wavelength of 1.5 μm (near-IR) the instrument is sensitive to the backscatter of aerosols and clouds and is able to scan the full hemisphere. The maximum detectable range  
20 depends on the presence of atmospheric particles and the lowest reliable range is at 105 m. At JOYCE the system is set to a range resolution of 30 m and performs plan position indicator scans every 15 min to estimate wind speed and direction profiles based on the velocity-azimuth display (VAD) method using 36 beams at 75° elevation. In addition the Doppler beam swing (DBS) technique with three beams and range height indicator scans are scheduled every 5 min and 30 min, respectively. The remaining time, the instrument is staring zenith to derive the vertical velocity with high temporal resolution (1 s).

25

To study land surface atmosphere exchange processes it is crucial to know the turbulent state of the boundary-layer. Therefore an objective classification of the mixing sources presented by Manninen et al. (2018) is utilized to describe the turbulence characteristics during MWR scans at JOYCE. The method is based on the combination of multiple Doppler lidar quantities including the dissipation rate of turbulent kinetic energy (TKE) derived from vertically pointing observations using the method  
30 presented in O'Connor et al. (2010). The TKE dissipation rate is based on the variance of the observed mean Doppler velocity and allows for a threshold based estimation of the convective boundary-layer (CBL) height by determining the last range bin in each profile with significant turbulence in a bottom-up approach.

### 2.3 MODIS IWV

The passive, imaging Moderate Resolution Imaging Spectroradiometer (MODIS) measures in 36 spectral bands ranging from 0.4  $\mu\text{m}$  to 14.4  $\mu\text{m}$ . Two MODIS instruments are currently airborne on NASA's sun-synchronous near-polar-orbiting Earth Observing System Terra and Aqua satellites. A full coverage of the globe is achieved in 1–2 days with an orbit height of 705 km and a scan rate of 20.3 rpm. The swath dimension of MODIS is 2330 km (cross track) and 10 km (along track at nadir). Within the 36 spectral bands, five channels in the 0.8–1.3  $\mu\text{m}$  near-infrared spectral region can be used for water vapor remote sensing (Gao and Kaufman, 2003). For IWV estimates the Level-2 (Collection 6.1) near-infrared retrieval (MODIS-NIR) with a 1 km spatial resolution is chosen. The retrieval by Gao and Kaufman (2003) is based on three channels at 0.936  $\mu\text{m}$ , 0.940  $\mu\text{m}$  and 0.905  $\mu\text{m}$  for the water vapor absorption and at 0.865  $\mu\text{m}$  and 1.24  $\mu\text{m}$  to correct for atmospheric gaseous absorption. In order to derive the total vertical amount of water vapor, the reflected NIR solar radiation in the water vapor absorption channel is compared to the window channels yielding the atmospheric water vapor transmittance. The amount of water vapor is then obtained from look-up tables derived from a line-by-line atmospheric transmittance code. Reliable estimates of the water vapor total column amount over land areas can only be inferred during daytime and for cloud free regions. Typical errors of the MODIS-NIR water vapor product range between 5–10%. Here, a height correction similar to Steinke et al. (2015) of the retrieved values is performed due to the variations of the horizontal and height distance to JOYCE per flight track of MODIS. The height difference is corrected by assuming an exponential decrease of the humidity profile and by using the water vapor density obtained from measurements of temperature, humidity and pressure of a weather sensor attached to the MWR and the topography with a 200 m horizontal resolution. Furthermore, the IWV product was resampled to 100 m for calculating the mean values of several overpasses.

20

### 2.4 ERA5 data products

To distinguish between local influences and large scale features regarding the observed spatial pattern of IWV deviations, the reanalysis products of ERA5 with a 31 km horizontal resolution are analyzed (Copernicus Climate Change Service (C3S), 2017). Besides the u and v wind components at different pressure levels (1000 hPa, 700 hPa), also the direction of the IWV transport (IWVT, in degree) is considered at a 3 h temporal resolution for the closest point to JOYCE. The vertical integral of water vapor flux, used to derive IWVT, is calculated utilizing the specific humidity and winds on model levels. The ERA5 IWV is selected at the closest output time to the MWR scans.

### 2.5 ICON-LEM

As a state-of-the-art atmospheric modeling system, the ICOSahedral Non-hydrostatic model ICON (Zängl et al., 2015) has been developed by the German Weather Service (DWD) and the Max Planck Institute for Meteorology (MPI-M). The ICON Large-Eddy Model (ICON-LEM) was designed within the framework of the High Definition Clouds and Precipitation for advancing Climate Prediction (HD(CP)<sup>2</sup>) project for improving moist processes in climate prediction models (Heinze et al.,

2017). In this study, the ICON-LEM simulations are used to provide a spatial representation of the IWV field to compare with the measurements obtained from the scanning MWR and the MODIS-NIR water vapor product around JOYCE.

A good agreement between simulations of ICON-LEM using high grid resolutions of up to 156 m and observations was already shown in Heinze et al. (2017) concerning turbulence, column water vapor and cumulus clouds (compared to satellite observations). Also the topographic influence on the wind field was shown in ICON-LEM simulations and observations at JOYCE (Marke et al., 2018). Therefore a similar setup with a domain radius size of 10 km, 78 m horizontal resolution and 20 km vertical extent is used in this study. The minimal layer thickness is 20 m and the lowest 2 km contain 33 levels. ~~As foreign data, Initial and lateral boundary conditions are created from the output of the~~ ECMWF Integrated Forecasting System (IFS) ~~model is used. As the IFS and the ICON model are not using an identical land surface model, a sensitivity of the simulations against the treatment of soil moisture and other land surface components can not be excluded. But those sensitivities are the same for both simulations and sensitivity studies implicate, that the results are rather robust despite small variations.~~ In addition to the control simulation using a simplified version of the land use input data GLOBCOVER (Bontemps et al., 2011) with a 300 m resolution, a second simulation is conducted with an altered land use setting. In this way parameters like leaf area index and roughness length are changed to get a different distribution of potential water vapor sources and sinks at the surface.

## 2.6 Land use classification and measurement site description

To be able to link atmospheric water vapor measurements with land surface properties, spatial land use information is needed. This is addressed by using a remote sensing-based regional crop map (Waldhoff et al., 2017) that was applied to a study area in Western Germany including the surrounding area of JOYCE. In this method, supervised multi-temporal remote sensing data of Sentinel-2, ancillary information and expert-knowledge on crops are combined in a Multi-Data Approach (MDA). The classification is therefore able to differentiate between 44 vegetated, urban and water areas with a spatial resolution of 15 m.

The detailed and highly resolved classification is used to identify areas with a predominant land use type. Therefore the classified types are condensed into five main types, in particular agricultural areas and grass land, bare ground, urban areas, deciduous forest and water. These five groups are expected to have a significantly different behavior in terms of transpiration and/or evaporation and therefore might cause atmospheric water vapor patterns that can be distinguished and related to the appropriate type. In Fig. 1 the simplified land use classification of a 12x13 km area centered around JOYCE is shown. The city of Jülich to the northwest but also JOYCE at the Research Center Jülich are the largest urban areas in this surrounding. The artificially created pit mine dump hill Sophienhöhe is located in the northeast direction, which is up to 200 m higher than JOYCE and covered mainly by a deciduous forest. In the northern and southeastern part of the selected domain mostly agricultural sites can be identified. The main crop types between April and September are winter wheat and sugar beet, but also maize and potato. A common crop rotation is a two year cycle of sugar beet to winter wheat (Waldhoff et al., 2017). Due to this crop rotation and regarding the small field sizes in this domain, no further distinction in crop types is made. The southwestern

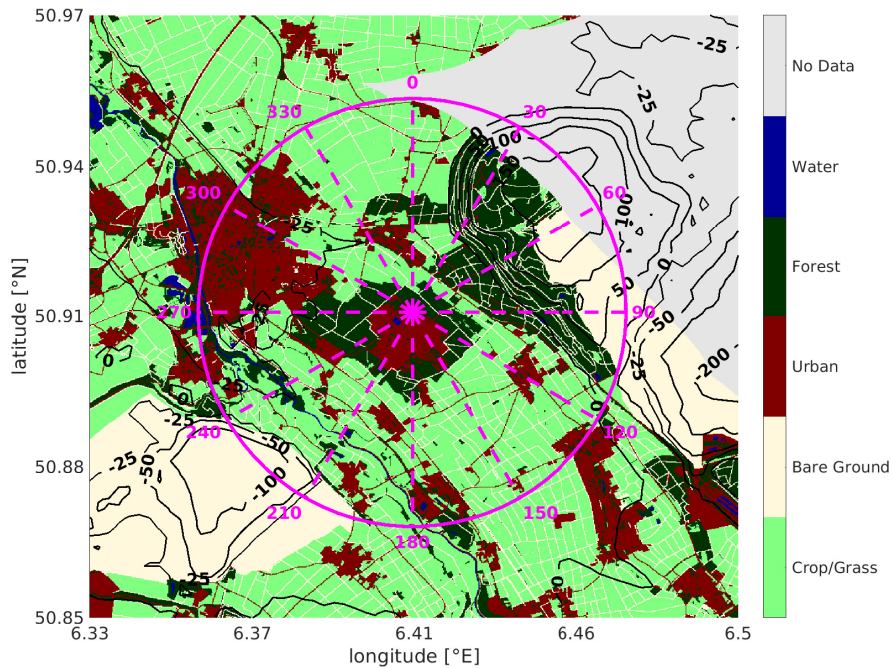

**Figure 1.** Simplified map (12x13 km) of the land use classification described in Waldhoff et al. (2017) centered around JOYCE. The highlighted-area-circle (4.3 km radius) shows the crossing distance and azimuth angles of the MWR scans at the IWV scaling height of 2.5 km. Contours refer to the height relative to JOYCE (111 m a.s.l.).

parts are mostly grass lands surrounding the Rur River, with its valley going from southeast to northwest. The pit mines (bare ground) with depressions down to 300 m below JOYCE are located to the east and southwest.

### 3 ResultsLong-term observed directional IWV deviations

#### 3.1 Long-term MWR scansData sample derivation and boundary-layer characteristics

- 5 In order to find patterns in the long-term water vapor scans at JOYCE, that can be related to local land surface characteristics, the MWR scans are evaluated during meteorological conditions that are favorable for strong land surface atmosphere interactions. This excludes overcast situations and large scale advection of moist or dry air as during these the surface influence is low as shown by Steinke et al. (2019) by the amplitude reduction of the diurnal water vapor cycle. The cloud detection is obtained by using the 31.4 GHz channel, which is within an atmospheric window. The signal from this channel is dominated by the presence
- 10 of liquid water in case of clouds appearing in the instrument's field of view. During a single scan the maximum difference of the measured 31.4 GHz brightness temperature for each azimuth direction and the mean of the whole scan must be below 2 K,

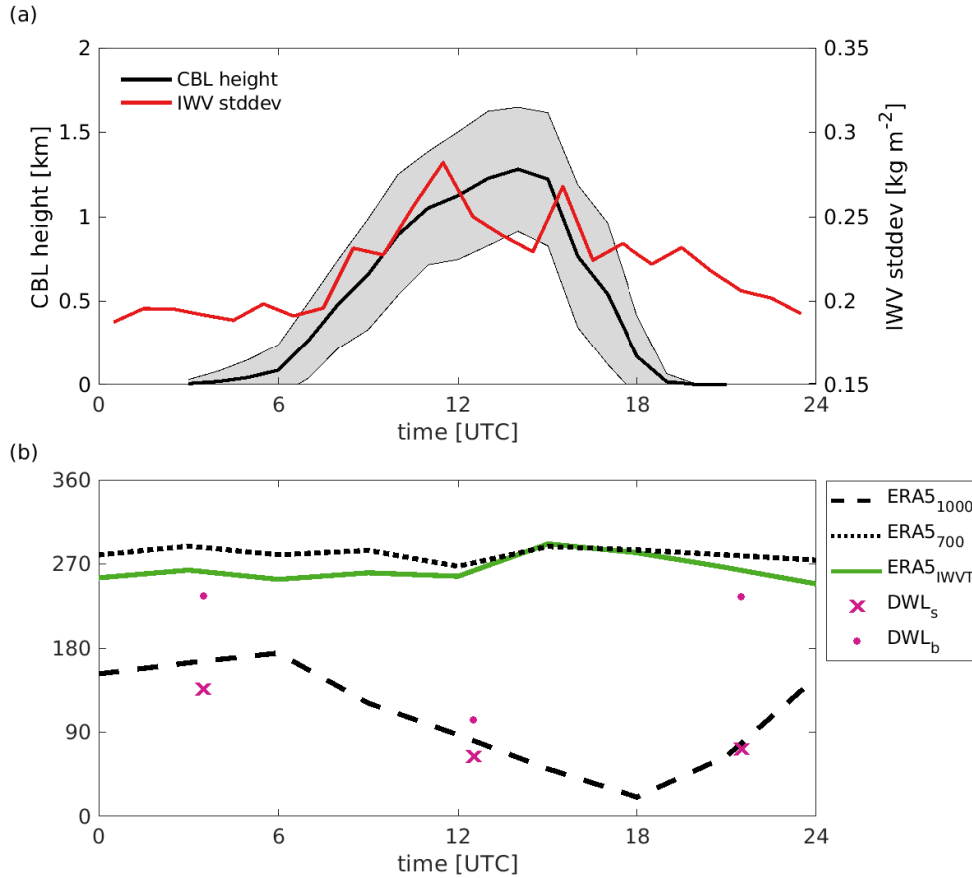

**Figure 2.** (a) Hourly ~~mean values of the water-vapor deviation-averaged convective boundary-layer (integrated up to 2.5 km CBL) height (with standard deviation in shadings)~~ from the ~~mean per Doppler lidar boundary-layer classification at the MWR scan times.~~ The zenith IWV standard deviation ( $IWV_{2.5}$ , number of scans: 7261 stddev), ~~binned for all 36 azimuth directions is determined within 1 h around the scans.~~ (b) The lines show the directions (in degree) of the averaged ERA5 wind directions at 1000 hPa (ERA5<sub>1000</sub>), 700 hPa (ERA5<sub>700</sub>) and the IWV transport (ERA5<sub>IWVT</sub>). Symbols indicate the mean Doppler lidar wind direction (average times: 01–06 UTC, 10–15 UTC, 19–24 UTC) at 105 m (DWL<sub>s</sub>) and 1005 m (DWL<sub>b</sub>). ~~(b) Hourly averaged TKE dissipation rate and convective boundary-layer (CBL) height (with standard deviation in shadings) from the Doppler lidar boundary-layer classification at the MWR scan times. The zenith IWV standard deviation (stddev) is determined within 1 h around the scans.~~

since liquid water clouds are expected to cause a much higher difference. Furthermore the air-mass corrected LWP from the statistical retrieval needs to be below  $20 \text{ g m}^{-2}$ , which is in the order of the retrieval uncertainty. To avoid scenes with large scale advection of moist or dry air, the difference between the maximum and minimum  $IWV_z$  within one hour around the scan needs to be smaller than  $2 \text{ kg m}^{-2}$ , which is above the instrument sensitivity. These requirements need to be fulfilled

for at least three consecutive scans. The first and last scan of each sequence is neglected to ensure that they are not part of a transition from conditions violating the criteria. The choice of the thresholds showed to be a good trade-off between excluding apparent cloudy situations, but still allowing a sufficient number of scans to generate a large data sample. Only the months between April and September between 2012–2018 are regarded, since the highest diurnal IWV variability is observed between  
5 spring and autumn at JOYCE (Löhnert et al., 2015) and the influence from the land surface is expected to be larger. During the observational period 316 days with in total 7261 single scans are selected with a mean  $IWV_z$  of  $18.00 \pm 6.37 \text{ kg m}^{-2}$  measured in a 1 h window around the scans.

~~(a) Scatter-plot of the mean zenith IWV derived from the MWR ( $IWV_{z,MWR}$ ) within 1 h around the scans and MODIS measurements ( $IWV_{z,MODIS}$ ) within a 1 km radius. (b) Mean values of the  $IWV_{2.5}$  deviations from the MWR scans around 1 h around the MODIS overpass and the corresponding MODIS IWV deviations for the cases in (a) including 61 MODIS overpasses and 172 MWR scans. The range and the median of the standard deviation for all scans is indicated by the vertical lines and dots, respectively.~~

At JOYCE the average year-to-year variability in terms of humidity is rather small, but still a good coverage of relatively dry and wet years is achieved in this study. As an exemplary measure, the mean zenith IWV taken around the selected scans for each year ranges from  $15.2 \text{ kg m}^{-2}$  to  $19.7 \text{ kg m}^{-2}$ . Therefore the variability of the zenith IWV values for the different years ( $4.1\text{--}7.2 \text{ kg m}^{-2}$ ) is in the range or higher than changes in the mean value. Instead of using the total slant column IWV, the humidity profile is integrated up to a scaling height of 2.5 km (hereafter:  $IWV_{2.5}$ ) for an analysis of the lower tropospheric water vapor patterns. This height, where the humidity profile drops below  $1/e$ , was found ~~as mean value for the zenith MWR measurements by averaging the  $1/e$  heights from all zenith measurements of the MWR within~~ 1 h around each of the selected  
15 scans. A similar scaling height was also found using satellite data (Simon and Joshi, 1994). For all scans, the mean value per scan is subtracted to investigate the deviations in each azimuth direction.

In addition, a co-located Doppler lidar is used to gain information on atmospheric turbulence, wind direction and wind speed during the scans. The temporal resolution of the Doppler lidar VAD scans is 15 min and the closest measurement to the scan  
25 time is selected. For the general development of the wind direction during the day, 6 h averages are calculated.

~~Figure 2(a) shows the hourly mean value of the  $IWV_{2.5}$  deviation binned for all 36 azimuth directions. A positive deviation up to 0.87% from the mean between  $180\text{--}250^\circ$  is visible throughout the day, with a shift to south-southeast during the afternoon and evening hours. Also a positive peak around  $75^\circ$  is present, showing no variations during the day. The number of scans per hour that are included in calculating the deviation meet the requirements ranges from 127 to 496 with less scans during midday. The decrease in number of cases during daytime is due to the formation of convective clouds, since overcast situations would influence the number of cases independent of the time of the day. Also the The mean standard deviation for each scan increases from 1.1% to 1.94% during daytime indicating the influence of convective activity, which is shown by high TKE dissipation rates and a corresponding mean CBL height up to 1.28 km (Fig. 2(ba)). ~~Note that these deviations are median values to detect the long-term pattern and that single scan deviations from the mean can get over 5%.~~ Also the IWV standard deviation from  
30 the zenith MWR measurements in Fig. 2(ba) reveals a diurnal cycle during this measurement period of late spring until early~~

autumn, which is in agreement with the seasonal statistics derived in Löhnert et al. (2015). While the IWV standard deviation follows the rate of the CBL height development in the morning hours, an abrupt decrease is only evident in the turbulence measurements in the afternoon transition period. This suggests that water vapor is mixed into the upper layers of the atmosphere during daytime and is still present in the residual layer throughout the night ~~and would explain the consistent pattern after sunset in Fig. 2(a).~~

~~Separating all cases according to the low-level wind direction from the Doppler lidar, no directional dependence is found.~~

For assessing the impact of the large scale water vapor transport, the ERA5 reanalysis product is used. The ERA5 IWV at the closest output time to the MWR scans compared to the 1 h averaged  $IWV_z$  from the MWR shows a high correlation coefficient of 0.98 and a root-mean-square error (RMSE) of only  $1.46 \text{ kg m}^{-2}$ . The ERA5 wind direction at 1000 hPa (ERA5<sub>1000</sub>) is in good agreement with the mean near surface wind direction (average times: 01–06 UTC, 10–15 UTC, 19–24 UTC) derived from the Doppler lidar at 105 m (DWL<sub>s</sub>, Fig. 2(ab)). The wind direction ranges from a southerly flow during night to an east to north direction during the day corresponding to fair weather situations and anticyclonic flow at this site. The wind direction turns clockwise with height for the ERA5 product and the Doppler lidar observations, but stays relatively constant within the CBL as there is no large difference between DWL<sub>s</sub> and the Doppler lidar wind direction at 1005 m (DWL<sub>b</sub>) between 10–15 UTC. The wind direction in the free troposphere at 700 hPa shows no significant diurnal cycle. The same applies to the IWVT, that corresponds to the westerly wind direction at 700 hPa, showing the west-wind-zone transport of humid air at the mid-latitudes; ~~which might contribute to the IWV<sub>2.5</sub> deviation scan pattern, especially during night.~~ But at midday and early afternoon ~~the positive deviations (10–15 UTC) positive IWV<sub>2.5</sub> deviations in the long-term MWR scans~~ increase and shift to the southeast (not shown). Despite the fact, that the ERA5 IWV shows a diurnal cycle, this shift can not be seen in the IWVT, suggesting that also local influences contribute to the observed IWV signal. This is further analyzed in ~~the next section.~~ section 3.2.

Separating all cases according to the low-level wind direction from the Doppler lidar, a directional dependence is found related to the wind speed. As an example, all MWR scans during northwesterly ( $270^\circ$ – $360^\circ$ ) winds are averaged separated by the median wind speed ( $5 \text{ m s}^{-1}$ ). Fig. 3 shows the highest positive deviations in the southwest direction for low wind speeds. For higher wind speeds this peak is shifted towards the southeast direction, indicating local transport and a shift of the MWR scanning beam and the underlying surface. The peak around  $70^\circ$  is not significantly changing, possibly due to a wind shading effect of the hill to the northeast. This dependency can also be seen for other wind directions. To exclude this process and to better connect the spatial IWV deviations with the surrounding land use, the following analysis is restricted to cases with wind speeds below the median value.

### **3.2 Comparison of daytime Daytime MWR and MODIS derived IWV deviations and connection to land use**

Figure 4(a) shows the daytime (10–15 UTC) mean value of the IWV<sub>2.5</sub> deviation for all 36 azimuth directions. In this time period the highest convective water vapor flux from the land surface into the atmosphere is expected. A positive deviation, as already mentioned for the northwest wind only scans (Fig. 3), up to 0.43% from the mean between  $200$ – $260^\circ$  is visible.

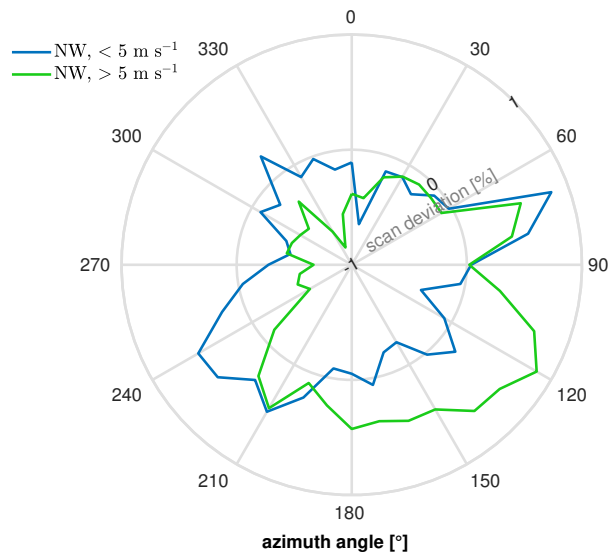

**Figure 3.** Mean values of the MWR water vapor deviation (integrated up to 2.5 km) from the mean per scan, for all 36 azimuth directions between 10–15 UTC. Different lines indicate MWR scans only for a Doppler lidar determined northwest wind direction and wind speed  $< 5 \text{ m s}^{-1}$  (112 scans) and  $> 5 \text{ m s}^{-1}$  (74 scans), respectively.

Also a positive peak around  $75^\circ$  is present. Whereas between  $270^\circ$ – $60^\circ$  mostly negative  $\text{IWV}_{2.5}$  deviations are present (up to  $-0.32\%$ ). Note that these deviations are median values to detect the long-term pattern and that single scan deviations from the mean can get over  $5\%$ .

- 5 For a comparison with an independent IWV measurement and to exclude that the patterns are influenced by interference, the MWR results are compared to the MODIS-NIR derived IWV around JOYCE. The findings presented here could also be valuable for further studies using the MODIS products for assessing spatial IWV differences, which is especially valuable for larger areas. For a fair comparison of the column amount of water vapor from MODIS to the path-integrated water vapor observations from the MWR scans, a virtual MWR scan is derived from the MODIS observations. Therefore, the total IWV
- 10 is distributed to an absolute humidity profile for each MODIS pixel assuming a linear decrease by 20% in the CBL and an exponential decrease above similar to Schween et al. (2011). The mean CBL height is determined from the Doppler lidar based boundary-layer classification (Manninen et al., 2018) available for around 1 h of each overpass. The CBL height is assumed to be constant in the area of interest, as well as the  $1/e$  height for the exponential decrease, which is calculated from the MWR humidity profile of the corresponding overpass. In this way a virtual scan corresponding to the MWR scan configuration can be
- 15 performed around JOYCE where the amount of water vapor is integrated for each beam. Only overpasses without missing data due to the MODIS quality checks are considered. A circular area with a radius of 4.3 km is chosen. This radius corresponds to the distance, where the beam at  $30^\circ$  reaches the water vapor scaling height of 2.5 km, which was found on average in the



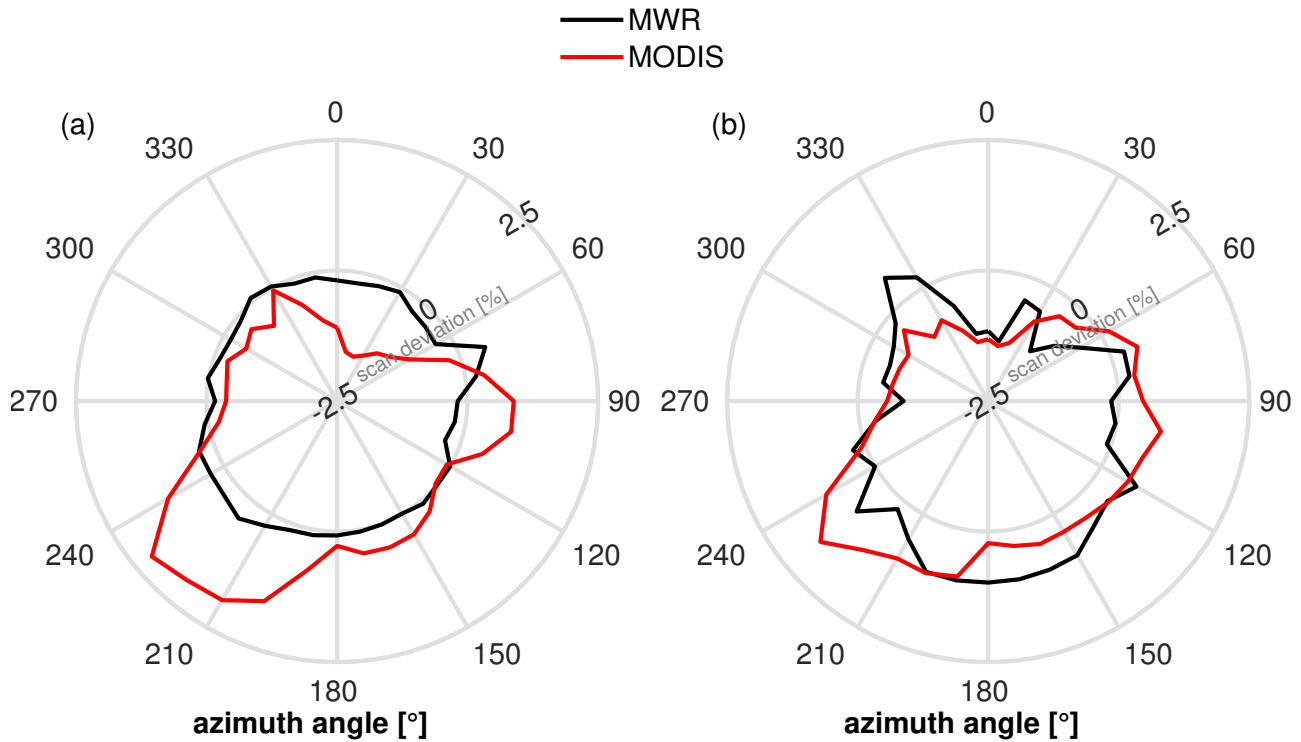

**Figure 4.** (a) Mean values of the MWR water vapor deviation (integrated up to 2.5 km) from the mean per scan between 10–15 UTC and wind speeds  $< 5 \text{ m s}^{-1}$  (406 scans). And mean values of the MODIS IWV deviations including 44 overpasses. (b) Same as (a), but for the 25 July 2012 case study including four MWR scans (10:15–11:10 UTC) and two MODIS overpasses (10:00 UTC, 11:40 UTC).

zenith MWR humidity measurements.

As an additional comparison of MWR and MODIS, the  $\text{IWV}_z$  measurements of the MWR ( $\text{IWV}_{z,\text{MWR}}$ ) and the MODIS mean total column amount 1 km around JOYCE ( $\text{IWV}_{z,\text{MODIS}}$ ) are compared (Fig. 3(a)). The zenith IWV values are highly correlated (0.980.99) with a RMSE of 2.792.93  $\text{kg m}^{-2}$ , which is about 1  $\text{kg m}^{-2}$  higher than found in Steinke et al. (2015). This discrepancy is probably caused by a greater IWV variability shown in Fig. 2(ba). For larger IWV values, the MODIS observations tend to an overestimation. For the 61-44 MODIS overpasses occurring between 9–13 UTC, the corresponding MWR scans within 1 h around the overpass are selected (172 scans) and for both data sets the mean IWV deviation from the (virtual) virtual scans are calculated (Fig. 3(b4(a)). Note that only showing the MWR scans during the MODIS overpasses does not change the deviation pattern significantly.

In general, the relative deviations from the MODIS virtual scans are higher by a factor of about 3-3-5. With both observations, a noticeable negative deviation between  $270^\circ$ – $60^\circ$  is visible, but also the agreement in the location of the maximum

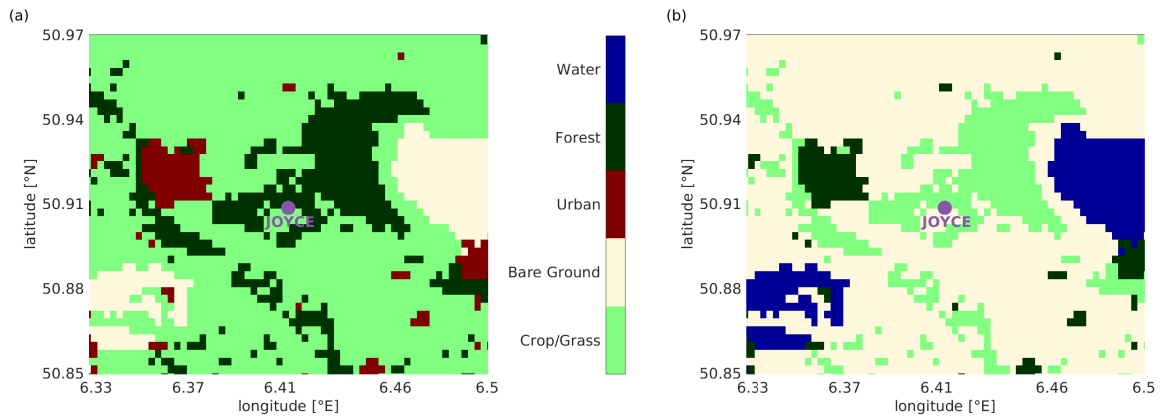

**Figure 5.** ~~Same as Fig. 3(ba) , but 12x13 km map of the simplified GLOBCOVER land use data centered around JOYCE used for the 25 July 2012 case study including four MWR scans first ICON-LEM simulation (10:15–11:10 UTC ICON1), two MODIS overpasses (10:00 UTC, 11:40 UTC) and Same as (a) but with altered land use types for the ICON1, second simulation (ICON2 simulations between 11:20–12:10 UTC).~~

positive deviations around  $225^\circ$  is evident. This area shows a high fraction of crop and grassland, the Rur River and one of the pit mines, whereas less water vapor seems to be present in the vicinity of the urban area and forested hill (Fig. 1). Regarding the MODIS derived results, also the pit mine around  $90^\circ$  reveals a positive deviation, but the peak for the MWR is shifted. This phenomena might be explained by the orographic flow which is strongly altered by the pit mines as shown in Marke  
 5 et al. (2018) and the low spatial resolution of the MODIS IWV product. The results suggest a higher water vapor flux into the atmosphere for the agricultural fields due to evapotranspiration (no irrigation) and the high amount of water vapor around the pit mines could be caused by irrigation to reduce dust emissions during the day and dew formation at night. In contrast, the forest and urban areas reveal a lower water vapor amount. This can be explained by less water availability in urban areas and a higher water use efficiency for deciduous forests compared to crop fields demonstrated in Tang et al. (2015). A similar  
 10 difference in the surface fluxes between crops during the main vegetation period and forest (pine trees) was found using surface flux measurements (Beyrich et al., 2006) and in the LES study by Garcia-Carreras et al. (2011). In addition, lower wind speeds due to the topography and a higher roughness length at the forested hill can cause decreased water vapor fluxes into the atmosphere. Thus, spatial water vapor differences can be detected by the scanning MWR, especially in a long-term perspective using a composite of carefully selected cases.

15

~~(a) 12x13 km map of the simplified GLOBCOVER land use data centered around JOYCE used for the first ICON-LEM simulation (ICON1). (b) Same as (a) but with altered land use types for the second simulation (ICON2).~~

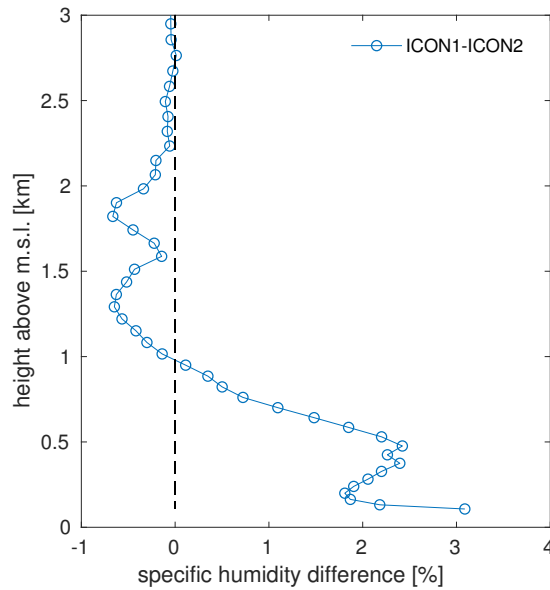

Figure 6. ICON-LEM specific humidity difference (ICON1–ICON2) profile averaged for the domain shown in Fig. 5.

### 3.3 ~~LES case study analysis~~

#### 4 LES case study analysis for land surface impact

The influence of the land use type on the atmospheric water vapor pattern evolution of the cloudy boundary-layer is further investigated in a case study (25 July 2012) by means of a large-eddy simulation using the ICON-LEM model. On this day, with a northwesterly wind direction, no clouds are observed until 12:30 UTC and the timings of the MODIS overpasses are 10:00 UTC and 11:40 UTC. In this time interval ~~four MWR scans are performed and~~ the CBL height determined by the Doppler lidar increases from 885 m to 1305 m ~~and four MWR scans are performed.~~ The results of the water vapor deviations are shown in Fig. 4(b). As already shown in the previous long-term analysis, the maximum positive deviation occurs in a southwesterly direction (MODIS) with a good agreement in the sign changes between MWR and MODIS. The positive peak for the MWR scans is shifted to the south, which is similar to the higher wind speed cases in Fig. 3, despite observed near surface wind speeds of only around  $3 \text{ m s}^{-1}$ . In order to make a general statement whether the ICON-LEM is correctly representing the spatial water vapor distribution, several high resolution simulations would be needed. Here, the focus is on assessing the impact of different land use data as input for the model on boundary-layer development and cloud formation.

15 In the first ICON-LEM simulation (ICON1) using the simplified GLOBCOVER land use data (Fig. 45(a)), the model boundary-layer height reaches these heights about one hour later than in the observations. ~~In order to compare a similar state of the boundary-layer in terms of convection, the analysis time for the simulations is shifted by one hour. Again, like for the~~

MODIS data, a virtual scan at 30° elevation is constructed and the absolute humidity is integrated up to 2.5 km. The mean  $IWV_z$  values are 24.83 kg m<sup>-2</sup> (MWR), 29.26 kg m<sup>-2</sup> (MODIS) and 28.22 kg m<sup>-2</sup> (ICON1), where the ICON1 zenith IWV is averaged within a radius of 1 km around JOYCE and for MODIS the nearest pixel is chosen.

ICON-LEM vertically averaged vertical velocity (top) and IWV (bottom) of the ICON1 (a,c) and ICON2 (b,d) simulations. Contours in (a), (b) refer to the topography relative to JOYCE in m a.s.l. between -200 m to 0 m (green) and 0 m to 200 m (black) in 50 m steps. Contours in (c), (d) show areas with total column integrated cloud water values above 10 g m<sup>-2</sup>. The results are averaged between 12–13 UTC.

Figure 5 shows the results of the comparison between the MWR, MODIS and ICON scans. As already shown in the previous long-term analysis, the maximum positive deviation occurs in a southerly direction with a good agreement in the sign changes between MWR and MODIS. For ICON1, the northeastern minimum deviation can be seen, but a higher positive deviation in the northwest is visible compared to MODIS and MWR. This might be due to a smaller extent of the urban area (4.8%) in the land use data with 300 m resolution, where small scale features are not resolved, compared to 18.5% in the land use classification shown in Fig. 1. Also a more dominant large scale humidity transport in the simulations could be a reason. The positive peak around the direction of the eastern pit mine is missed in ICON1, probably because of a different position, extent and depth of the mine for the production period of the GLOBCOVER data (2009) compared to the year of the simulation (2012).

In a second simulation (ICON2), the land use types are changed according to Fig. 45(b) (crop/grass to bare ground, bare ground to water, urban to forest, forest to crop/grass and water to urban). In this way, a significant reconstruction in the spatial distribution of the land use types is achieved without changing the scale of heterogeneity. The comparison in the IWV deviation and keeping all occurring types. Also the partitioning of turbulent surface fluxes is largely affected by changing crop/grass land to bare soil, but for the whole simulation time the domain averaged sum of latent and sensible heat only differs by around 10 W m<sup>-2</sup> between ICON1 and ICON2 shows higher IWV values in the northwest for. The maximum height above ground, where changing the land use types has still a significant influence on model parameters, is around 2.3–2.5 km, which is visible for example in the domain averaged specific humidity difference (ICON1 and in the southwest for ICON2. To –ICON2) profile (Fig. 6). Above this height the large scale forcings are more dominant, which are the same for both simulations. The highest difference occurs in the CBL, which is in agreement with Sühring and Raasch (2013) showing that heterogeneous surface patterns extend throughout the CBL for simulated turbulent heat fluxes. Also Shao et al. (2013) found an influence of land-surface heterogeneity well beyond the surface layer using LES.

In order to elaborate the details of this difference different boundary-layer and cloud development, the spatial fields of height and time averaged vertical velocity and mean IWV integrated humidity up to 2.5 km ( $IWV_{2.5}$ ) are analyzed (Fig. 67). The averaging domain is the same as shown in Fig. 45 and the averaging time is between 12–13 UTC, which is the time range of the first cloud formation in the simulations. Poll et al. (2017) also performed large-eddy simulations of this day in a similar domain and showed the occurrence of clouds around this time in visible satellite data. They found cellular structures regarding the vertical velocity, which is also evident in Fig. 67(a). In addition, the wind is lifted by the hill and a downdraft above the hill

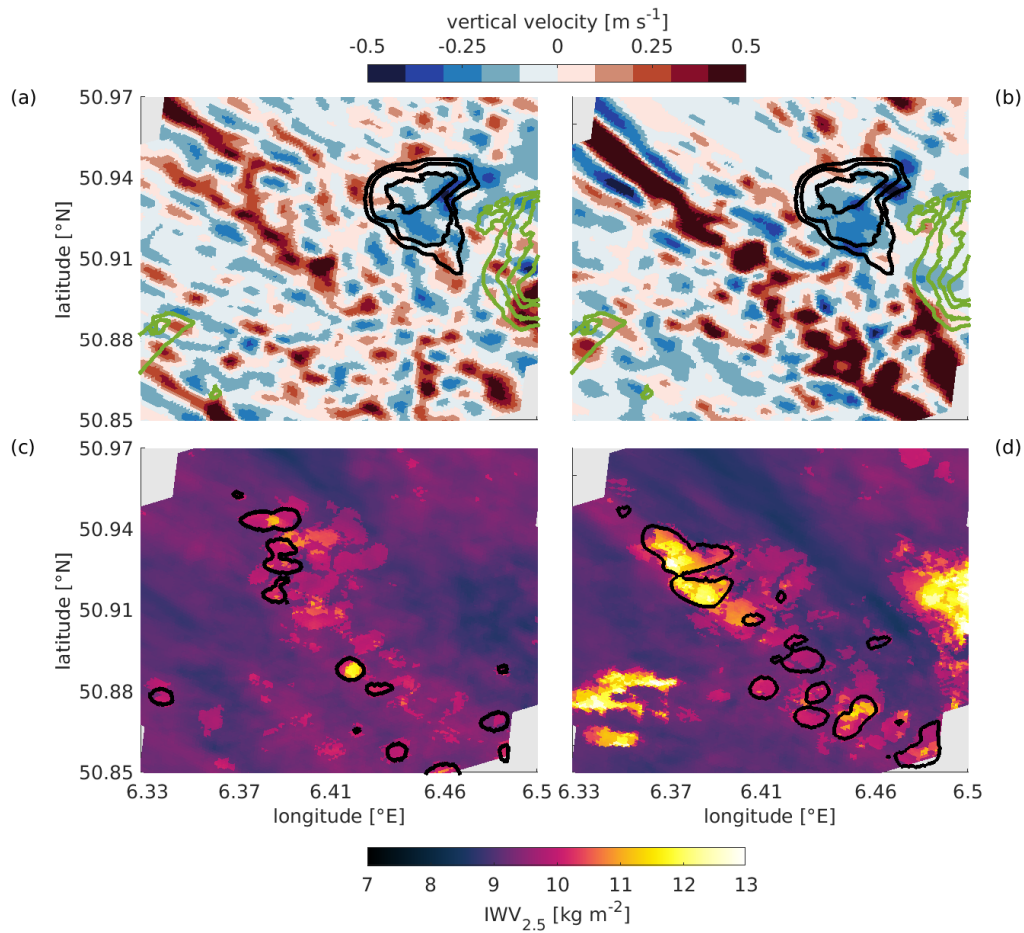

**Figure 7.** ICON-LEM vertically averaged vertical velocity (top) and integrated humidity (bottom) up to 2.5 km of the ICON1 (a,c) and ICON2 (b,d) simulations. Contours in (a), (b) refer to the topography relative to JOYCE in ma.s.l. between -200 m to 0 m (green) and 0 m to 200 m (black) in 50 m steps. Contours in (c), (d) show areas with total column integrated cloud water values above  $10 \text{ g m}^{-2}$ . The results are averaged between 12–13 UTC.

can be seen. This was already discussed in Marke et al. (2018) and might explain parts of the lower water vapor flux negative scan deviations to the northeast, as discussed in Sect. 3.1–3.2, by a suppressed water vapor flux. Moreover the hill serves as a natural border and is impacting by channeling the updraft streak with associated water vapor transport and cloud formation going from northwest to southeast. The streaks are also visible in simulations using a larger domain, lower resolution, no topography and only bare ground (not shown), but the position and strength is strongly altered by the topography and land use input.

In the ICON2 simulation, with a larger fraction of bare ground, simulation the differences in surface properties and the size of the heterogeneous land use patches ~~seem to be large enough to cause a secondary circulation (Garcia-Carreras et al., 2011; van Heerwaarden~~ in roll structures of intensifies the vertical velocity. ~~Less vegetated areas also lead to an increase in the mean wind speed of  $0.42 \text{ m s}^{-1}$  at approximately 200 m above ground.~~

5 ~~ICON-LEM specific cloud water content for the ICON1 (a) and ICON2 (b) simulation together with the surface fluxes of latent and sensible heat. The results are averaged for the domain shown in Fig. 4.~~

~~The change in the circulation pattern due to the different land use input can explain the differences in IWV deviation (Fig. 5), since more water vapor is transported in the enhanced updraft streak streak structure, leading to a higher water vapor transport from the surrounding area into the updraft region and an earlier cloud formation. The water bodies introduced in the second~~  
10 simulation show higher  $IWV_{2.5}$  values (Fig. 67(d)).~~The strong circulation effect might also reduce the influence of other humidity sources, like the introduced water bodies at the positions of the pit mines in ICON2. The formation of convective clouds in the simulations is affected as well. Whereas in ICON1 the cloud distribution is rather patchy, clouds form only along the high IWV region in ICON2. Also the~~, but sensible heat flux and CBL height are too low for clouds to form. The mean cloud cover of 8.55% in ICON1 compared to 10.55% in ICON2 is closer to the observed maximum cloud cover of 6% determined  
15 by a total sky imager at JOYCE. ~~The maximum integrated cloud water content of these clouds is  $36.96 \text{ g m}^{-2}$  (ICON1) and  $5.61 \text{ g m}^{-2}$  (ICON2).~~ The specific cloud water content on this day.

Less vegetated areas and hence a lower roughness length in ICON2 also lead to an increase in the mean wind speed of  $0.42 \text{ m s}^{-1}$  at approximately 200 m above ground. With higher wind speeds and a higher fraction of bare ground the domain  
20 averaged sensible heat flux (between 11–18 UTC) in ICON2 is increased by  $28.72 \text{ W m}^{-2}$  and the CBL grows deeper (by about 30 m) especially in the southeastern part of the domain. On the other side the specific humidity in ICON1 is significantly  
higher and the larger in the CBL (Fig. 6) and clouds grow taller compared to the ICON2 simulation (Fig. 78), which is connected to a higher an increased latent heat flux by  $86.04 \text{ W m}^{-2}$  in ICON1 due to more vegetated areas. On the other side the boundary layer grows deeper (by about 30 m)  
25 Also the maximum integrated cloud water content of these clouds is  
 $36.96 \text{ g m}^{-2}$  (ICON1) and only  $5.61 \text{ g m}^{-2}$  in ICON2 because of the increased sensible heat flux caused by a higher fraction of bare ground. This shows the connections of the different Earth system compartments and stresses limited moisture supply. The drastic change in the land use data input for ICON2 therefore causes a shift in the partitioning between sensible and latent heat flux, which has strong implications for the development of convective clouds. Thus the long-term observed spatial water vapor deviations and high-resolution LES conducted in this study underline  
30 the importance of further monitoring and modeling  
the interactions between the local and small scale interactions between land use, water vapor topography, water vapor transport and the transition to clouds.

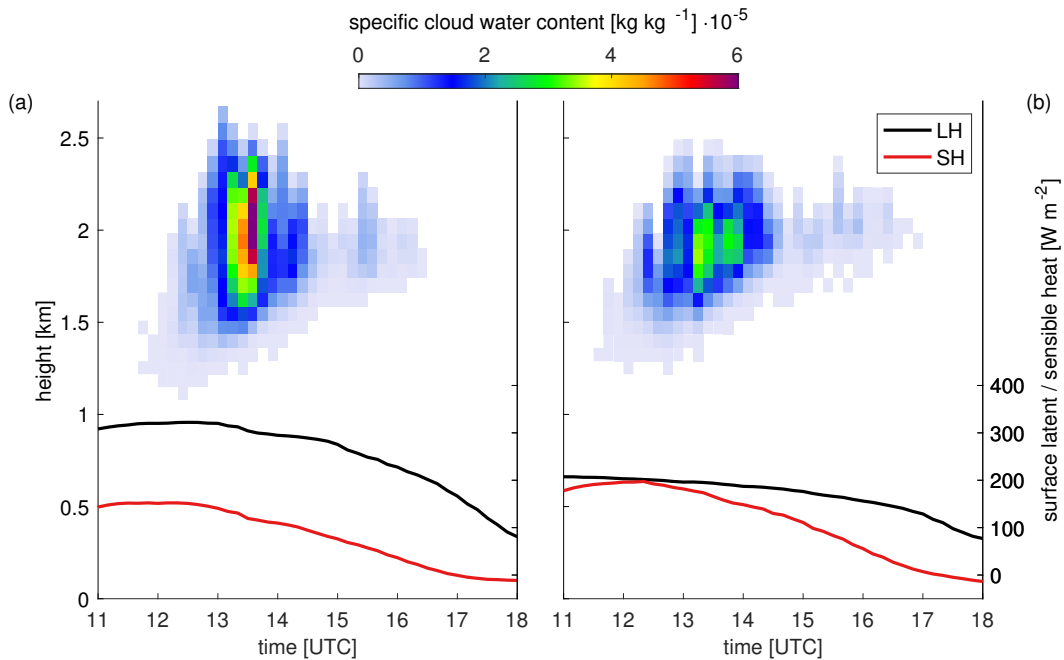

**Figure 8.** ICON-LEM specific cloud water content for the ICON1 (a) and ICON2 (b) simulation together with the surface fluxes of latent and sensible heat. The results are averaged for the domain shown in Fig. 5.

## 5 Conclusions

Exchange processes between the land surface and atmosphere are an important controlling factor in the water cycle. Long-term observational evidence of this interaction in-spanning scales of a few kilometers is still lacking. The scanning microwave radiometer (MWR) at the Jülich ObservatorY for Cloud Evolution (JOYCE) proved to be suitable for detecting spatial IWV deviations for single scans, but also in a statistical sense. The atmospheric water vapor pattern can only partly be explained by the large-scale driven advection and is also attributed to the local transport of water vapor from the surface, especially during convective scenes. This is detected in the the long-term analysis of over-7200 liquid water cloud free scans within six years of observations.

10 The comparison to the satellite-based MODIS near-infrared IWV product, as an independent observation, shows similar features of areas with pronounced positive and negative deviations around JOYCE. In a further step, these deviations can be related qualitatively to land surface properties by means of a land use classification. The classification is based on a remote sensing derived regional crop map and reveals, that positive IWV deviations mainly originate over agriculture areas and open pit mines close to the measurement site, while urban and elevated forest areas show negative deviations. The locations of the

maximum and minimum deviation in the MODIS and MWR measurements are in agreement.

In a comprehensive case study, large-eddy simulations by the high resolution ICON-LEM model ~~are~~ were carried out to further assess the impact of the land surface on the ~~atmospheric water vapor field~~ development of the cloudy boundary-layer.

- 5 While the control simulation is initiated with a realistic land use input ~~showed similar characteristics of spatial IWV deviations~~, the second simulation with modified land use types revealed changes in ~~the mesoscale circulation, cloud characteristics and IWV distribution according to the altered land surface~~ convective motions and cloud characteristics according to differences in surface fluxes. These findings suggest that ground-based remote sensing of water vapor supported by high resolution modeling can be valuable for studying the regional influence of heterogeneous land surfaces on the atmospheric water vapor and the
- 10 connection between surface fluxes, water vapor and clouds.

*Author contributions.* TM, SC and UL designed the experiments and processed the observational data. VS performed the ICON-LEM simulations and TM prepared the manuscript with contributions from all co-authors.

*Competing interests.* The authors declare that they have no conflict of interest.

- Acknowledgements.* The authors would like to acknowledge the Transregional Collaborative Research Centre (TR32) "Patterns in Soil-
- 15 Vegetation-Atmosphere Systems" funded by the German Science Foundation (DFG), which has continuously contributed to the instrumentation of JOYCE-CF and its maintenance as well as funding T. Marke. Further, the Humidity And Temperature PROfiler (HATPRO) used in this study have been funded by DFG infrastructural programs under the grant INST 216/681-1. The MODIS/Terra Total Precipitable Water Vapor 5-Min L2 Swath 1km dataset was acquired from the Level-1 and Atmosphere Archive & Distribution System (LAADS) Distributed Active Archive Center (DAAC), located in the Goddard Space Flight Center in Greenbelt, Maryland (<https://ladsweb.nascom.nasa.gov/>).



## References

- Adler, B., Kalthoff, N., Kohler, M., Handwerker, J., Wieser, A., Corsmeier, U., Kottmeier, C., Lambert, D., and Bock, O.: The variability of water vapour and pre-convective conditions over the mountainous island of Corsica, *Quarterly Journal of the Royal Meteorological Society*, 142, 335–346, <https://doi.org/10.1002/qj.2545>, 2016.
- 5 Avissar, R. and Schmidt, T.: An Evaluation of the Scale at which Ground-Surface Heat Flux Patchiness Affects the Convective Boundary Layer Using Large-Eddy Simulations, *Journal of the Atmospheric Sciences*, 55, 2666–2689, [https://doi.org/10.1175/1520-0469\(1998\)055<2666:aeotsa>2.0.co;2](https://doi.org/10.1175/1520-0469(1998)055<2666:aeotsa>2.0.co;2), 1998.
- Beyrich, F., Leps, J.-P., Mauder, M., Bange, J., Foken, T., Huneke, S., Lohse, H., Lüdi, A., Meijninger, W. M. L., Mironov, D., Weisensee, U., and Zittel, P.: Area-Averaged Surface Fluxes Over the Litfass Region Based on Eddy-Covariance Measurements, *Boundary-Layer Meteorology*, 121, 33–65, <https://doi.org/10.1007/s10546-006-9052-x>, 2006.
- 10 Bontemps, S., Defourny, P., Van Bogaert, E., Arino, O., Kalogirou, V., and Ramos Perez, J. J.: GLOBCOVER 2009 Products Description and Validation Report, Université catholique de Louvain (UCL) & European Space Agency (ESA), 2.2, 53 pp, 2011.
- Clark, C. A. and Arritt, P. W.: Numerical Simulations of the Effect of Soil Moisture and Vegetation Cover on the Development of Deep Convection, *Journal of Applied Meteorology*, 34, 2029–2045, [https://doi.org/10.1175/1520-0450\(1995\)034<2029:NSOTEO>2.0.CO;2](https://doi.org/10.1175/1520-0450(1995)034<2029:NSOTEO>2.0.CO;2), 1995.
- 15 Copernicus Climate Change Service (C3S): ERA5: Fifth generation of ECMWF atmospheric reanalyses of the global climate. Copernicus Climate Change Service Climate Data Store (CDS), Copernicus Climate Change Service Climate Data Store (CDS), date of access: 03/03/2019, 2017.
- Courault, D., Drobinski, P., Brunet, Y., Lacarrere, P., and Talbot, C.: Impact of surface heterogeneity on a buoyancy-driven convective boundary layer in light winds, *Boundary-Layer Meteorology*, 124, 383–403, <https://doi.org/10.1007/s10546-007-9172-y>, 2007.
- 20 Eder, F., De Roo, F., Rotenberg, E., Yakir, D., Schmid, H. P., and Mauder, M.: Secondary circulations at a solitary forest surrounded by semi-arid shrubland and their impact on eddy-covariance measurements, *Agricultural and Forest Meteorology*, 211–212, 115–127, <https://doi.org/10.1016/j.agrformet.2015.06.001>, 2015.
- Gao, B.-C. and Kaufman, Y. J.: Water vapor retrievals using Moderate Resolution Imaging Spectroradiometer (MODIS) near-infrared channels, *Journal of Geophysical Research: Atmospheres*, 108, <https://doi.org/10.1029/2002jd003023>, 2003.
- 25 Garcia-Carreras, L., Parker, D. J., and Marsham, J. H.: What is the Mechanism for the Modification of Convective Cloud Distributions by Land Surface–Induced Flows?, *Journal of the Atmospheric Sciences*, 68, 619–634, <https://doi.org/10.1175/2010jas3604.1>, 2011.
- Heinze, R., Dipankar, A., Henken, C. C., Moseley, C., Sourdeval, O., Trömel, S., Xie, X., Adamidis, P., Ament, F., Baars, H., Barthlott, C., Behrendt, A., Blahak, U., Bley, S., Brdar, S., Brueck, M., Crewell, S., Deneke, H., Di Girolamo, P., Evaristo, R., Fischer, J., Frank, C., Friederichs, P., Göcke, T., Gorges, K., Hande, L., Hanke, M., Hansen, A., Hege, H.-C., Hoese, C., Jahns, T., Kalthoff, N., Klocke, D., Kneifel, S., Knippertz, P., Kuhn, A., van Laar, T., Macke, A., Maurer, V., Mayer, B., Meyer, C. I., Muppa, S. K., Neggers, R. A. J., Orlandi, E., Pantillon, F., Pospichal, B., Röber, N., Scheck, L., Seifert, A., Seifert, P., Senf, F., Siligam, P., Simmer, C., Steinke, S., Stevens, B., Wapler, K., Weniger, M., Wulfmeyer, V., Zängl, G., Zhang, D., and Quaas, J.: Large-eddy simulations over Germany using ICON: a comprehensive evaluation: Evaluation of ICON in Realistic LES Configuration, *Quarterly Journal of the Royal Meteorological Society*, 35, 143, 69–100, <https://doi.org/10.1002/qj.2947>, 2017.
- Huang, H. Y. and Margulis, S. A.: On the impact of surface heterogeneity on a realistic convective boundary layer, *Water Resources Research*, 45, <https://doi.org/10.1029/2008WR007175>, 2009.

- Kneifel, S., Crewell, S., Lohnert, U., and Schween, J.: Investigating Water Vapor Variability by Ground-Based Microwave Radiometry: Evaluation Using Airborne Observations, *IEEE Geoscience and Remote Sensing Letters*, 6, 157–161, <https://doi.org/10.1109/LGRS.2008.2007659>, 2009.
- Löhnert, U. and Crewell, S.: Accuracy of cloud liquid water path from ground-based microwave radiometry 1. Dependency on cloud model statistics, *Radio Science*, 38, <https://doi.org/10.1029/2002rs002654>, 2003.
- Löhnert, U., Schween, J. H., Acquistapace, C., Ebell, K., Maahn, M., Barrera-Verdejo, M., Hirsikko, A., Bohn, B., Knaps, A., O'Connor, E., Simmer, C., Wahner, A., and Crewell, S.: JOYCE: Jülich Observatory for Cloud Evolution, *Bulletin of the American Meteorological Society*, 96, 1157–1174, <https://doi.org/10.1175/BAMS-D-14-00105.1>, <https://doi.org/10.1175/BAMS-D-14-00105.1>, 2015.
- Macke, A., Seifert, P., Baars, H., Barthlott, C., Beekmans, C., Behrendt, A., Bohn, B., Brueck, M., Bühl, J., Crewell, S., Damian, T., Deneke, H., Düsing, S., Foth, A., Di Girolamo, P., Hammann, E., Heinze, R., Hirsikko, A., Kalisch, J., Kalthoff, N., Kinne, S., Kohler, M., Löhnert, U., Madhavan, B. L., Maurer, V., Muppa, S. K., Schween, J., Serikov, I., Siebert, H., Simmer, C., Späth, F., Steinke, S., Träumner, K., Trömel, S., Wehner, B., Wieser, A., Wulfmeyer, V., and Xie, X.: The {HD}{CP}<sup>2</sup> {Observational} {Prototype} {Experiment} ({HOPE}) – an overview, *Atmospheric Chemistry and Physics*, 17, 4887–4914, <https://doi.org/10.5194/acp-17-4887-2017>, 2017.
- Manninen, A. J., Marke, T., Tuononen, M., and O'Connor, E. J.: Atmospheric Boundary Layer Classification With Doppler Lidar, *Journal of Geophysical Research: Atmospheres*, 123, 8172–8189, <https://doi.org/10.1029/2017JD028169>, 2018.
- Marke, T., Crewell, S., Schemann, V., Schween, J. H., and Tuononen, M.: Long-term observations and high-resolution modeling of midlatitude nocturnal boundary layer processes connected to low-level jets, *Journal of Applied Meteorology and Climatology*, 57, 1155–1170, <https://doi.org/10.1175/JAMC-D-17-0341.1>, 2018.
- Maronga, B. and Raasch, S.: Large-Eddy Simulations of Surface Heterogeneity Effects on the Convective Boundary Layer During the LITFASS-2003 Experiment, *Boundary-Layer Meteorology*, 146, 17–44, <https://doi.org/10.1007/s10546-012-9748-z>, 2013.
- Maschwitz, G., Löhnert, U., Crewell, S., Rose, T., and Turner, D. D.: Investigation of ground-based microwave radiometer calibration techniques at 530 hPa, *Atmospheric Measurement Techniques*, 6, 2641–2658, <https://doi.org/10.5194/amt-6-2641-2013>, 2013.
- O'Connor, E. J., Illingworth, A. J., Brooks, I. M., Westbrook, C. D., Hogan, R. J., Davies, F., Brooks, and J., B.: A method for estimating the turbulent kinetic energy dissipation rate from a vertically pointing doppler lidar, and independent evaluation from balloon-borne in situ measurements, *Journal of Atmospheric and Oceanic Technology*, 27, 1652–1664, <https://doi.org/10.1175/2010JTECHA1455.1>, 2010.
- Ookouchi, Y., Segal, M., Kessler, R. C., and Pielke, R. A.: Evaluation of Soil Moisture Effects on the Generation and Modification of Mesoscale Circulations, *Monthly Weather Review*, 112, 2281–2292, [https://doi.org/10.1175/1520-0493\(1984\)112<2281:eosmeo>2.0.co;2](https://doi.org/10.1175/1520-0493(1984)112<2281:eosmeo>2.0.co;2), 1984.
- Pearson, G., Davies, F., and Collier, C.: An Analysis of the Performance of the UFAM Pulsed Doppler Lidar for Observing the Boundary Layer, *Journal of Atmospheric and Oceanic Technology*, 26, 240–250, <https://doi.org/10.1175/2008JTECHA1128.1>, 2009.
- Pielke, R. A., Dalu, G. A., Snook, J. S., Lee, T. J., and Kittel, T. G. F.: Nonlinear Influence of Mesoscale Land Use on Weather and Climate, *Journal of Climate*, 4, 1053–1069, [https://doi.org/10.1175/1520-0442\(1991\)004<1053:niomlu>2.0.co;2](https://doi.org/10.1175/1520-0442(1991)004<1053:niomlu>2.0.co;2), 1991.
- Poll, S., Shrestha, P., and Simmer, C.: Modelling convectively induced secondary circulations in the *terra incognita* with TerrSysMP: Modelling CISCs in the Terra Incognita with TerrSysMP, *Quarterly Journal of the Royal Meteorological Society*, 143, 2352–2361, <https://doi.org/10.1002/qj.3088>, 2017.
- Rabin, R. M., Stadler, S., Wetzol, P. J., Stensrud, D. J., and Gregory, M.: Observed Effects of Landscape Variability on Convective Clouds, *Bulletin of the American Meteorological Society*, 71, 272–280, [https://doi.org/10.1175/1520-0477\(1990\)071<0272:oeolvo>2.0.co;2](https://doi.org/10.1175/1520-0477(1990)071<0272:oeolvo>2.0.co;2), 1990.

- Rose, T., Crewell, S., Löhnert, U., and Simmer, C.: A network suitable microwave radiometer for operational monitoring of the cloudy atmosphere, *Atmospheric Research*, 75, 183–200, <https://doi.org/10.1016/j.atmosres.2004.12.005>, 2005.
- Schween, J. H., Crewell, S., and Löhnert, U.: Horizontal-humidity gradient from one single-scanning microwave radiometer, *IEEE Geoscience and Remote Sensing Letters*, 8, 336–340, <https://doi.org/10.1109/LGRS.2010.2072981>, 2011.
- 5 Shao, Y., Liu, S., Schween, J. H., and Crewell, S.: Large-Eddy Atmosphere–Land-Surface Modelling over Heterogeneous Surfaces: Model Development and Comparison with Measurements, *Boundary-Layer Meteorology*, 148, 333–356, <https://doi.org/10.1007/s10546-013-9823-0>, 2013.
- Simmer, C., Thiele-Eich, I., Masbou, M., Amelung, W., Bogena, H., Crewell, S., Diekkrüger, B., Ewert, F., Hendricks Franssen, H.-J., Huisman, J. A., Kemna, A., Klitzsch, N., Kollet, S., Langensiepen, M., Löhnert, U., Rahman, A. S. M. M., Rascher, U., Schneider, K., Schween, J., Shao, Y., Shrestha, P., Stiebler, M., Sulis, M., Vanderborght, J., Vereecken, H., van der Kruk, J., Waldhoff, G., and Zerenner, T.: Monitoring and Modeling the Terrestrial System from Pores to Catchments: The Transregional Collaborative Research Center on Patterns in the Soil–Vegetation–Atmosphere System, *Bulletin of the American Meteorological Society*, 96, 1765–1787, <https://doi.org/10.1175/BAMS-D-13-00134.1>, 2015.
- 10 Simon, B. and Joshi, P. C.: Determination of moisture changes prior to the onset of south-west monsoon over Kerala using NOAA/TOVS satellite data, *Meteorology and Atmospheric Physics*, 53, 223–231, <https://doi.org/10.1007/BF01029613>, 1994.
- Späth, F., Behrendt, A., Kumar Muppa, S., Metzendorf, S., Riede, A., and Wulfmeyer, V.: 3-D water vapor field in the atmospheric boundary layer observed with scanning differential absorption lidar, *Atmospheric Measurement Techniques*, 9, 1701–1720, <https://doi.org/10.5194/amt-9-1701-2016>, 2016.
- Steinke, S., Eikenberg, S., Löhnert, U., Dick, G., Klocke, D., Di Girolamo, P., and Crewell, S.: Assessment of small-scale integrated water vapour variability during HOPE, *Atmospheric Chemistry and Physics*, 15, 2675–2692, <https://doi.org/10.5194/acp-15-2675-2015>, 2015.
- 20 Steinke, S., Wahl, S., and Crewell, S.: Benefit of high resolution COSMO reanalysis: The diurnal cycle of column-integrated water vapor over Germany, *Meteorologische Zeitschrift*, 28, 165–177, <https://doi.org/10.1127/metz/2019/0936>, 2019.
- Sühling, M. and Raasch, S.: Heterogeneity-Induced Heat-Flux Patterns in the Convective Boundary Layer: Can they be Detected from Observations and is There a Blending Height?—A Large-Eddy Simulation Study for the LITFASS-2003 Experiment, *Boundary-Layer Meteorology*, 148, 309–331, <https://doi.org/10.1007/s10546-013-9822-1>, 2013.
- 25 Tang, X., Li, H., Desai, A. R., Nagy, Z., Luo, J., Kolb, T. E., Oliosio, A., Xu, X., Yao, L., Kutsch, W., Pilegaard, K., Köstner, B., and Ammann, C.: How is water-use efficiency of terrestrial ecosystems distributed and changing on Earth?, *Scientific Reports*, 4, <https://doi.org/10.1038/srep07483>, 2015.
- van Heerwaarden, C. C. and Vilà-Guerau De Arellano, J.: Relative Humidity as an Indicator for Cloud Formation over Heterogeneous Land Surfaces, *Journal of the Atmospheric Sciences*, 65, 3263–3277, <https://doi.org/10.1175/2008JAS2591.1>, 2008.
- 30 van Heerwaarden, C. C., Mellado, J. P., and De Lozar, A.: Scaling Laws for the Heterogeneously Heated Free Convective Boundary Layer, *Journal of the Atmospheric Sciences*, 71, 3975–4000, <https://doi.org/10.1175/JAS-D-13-0383.1>, 2014.
- Vilà-Guerau De Arellano, J., Ouwersloot, H. G., Baldocchi, D., and Jacobs, C. M.: Shallow cumulus rooted in photosynthesis, *Geophysical Research Letters*, 41, 1796–1802, <https://doi.org/10.1002/2014GL059279>, 2014.
- 35 Waldhoff, G., Lussem, U., and Bareth, G.: Multi-Data Approach for remote sensing-based regional crop rotation mapping: A case study for the Rur catchment, Germany, *International Journal of Applied Earth Observation and Geoinformation*, 61, 55–69, <https://doi.org/10.1016/j.jag.2017.04.009>, 2017.

- Weckwerth, T. M., Parsons, D. B., Koch, S. E., Moore, J. A., LeMone, M. A., Demoz, B. B., Flamant, C., Geerts, B., Wang, J., and Feltz, W. F.: An Overview of the International H<sub>2</sub>O Project (IHOP\_2002) and Some Preliminary Highlights, *Bulletin of the American Meteorological Society*, 85, 253–278, <https://doi.org/10.1175/BAMS-85-2-253>, 2004.
- 5 Wulfmeyer, V., Behrendt, A., Kottmeier, C., Corsmeier, U., Barthlott, C., Craig, G. C., Hagen, M., Althausen, D., Aoshima, F., Arpagaus, M., Bauer, H.-S., Bennett, L., Blyth, A., Brandau, C., Champollion, C., Crewell, S., Dick, G., Di Girolamo, P., Dorninger, M., Dufournet, Y., Eigenmann, R., Engelmann, R., Flamant, C., Foken, T., Gorgas, T., Grzeschik, M., Handwerker, J., Hauck, C., Höller, H., Junkermann, W., Kalthoff, N., Kiemle, C., Klink, S., König, M., Krauss, L., Long, C. N., Madonna, F., Mobbs, S., Neining, B., Pal, S., Peters, G., Pigeon, G., Richard, E., Rotach, M. W., Russchenberg, H., Schwitalla, T., Smith, V., Steinacker, R., Trentmann, J., Turner, D. D., van Baelen, J., Vogt, S., Volkert, H., Weckwerth, T., Wernli, H., Wieser, A., and Wirth, M.: The Convective and Orographically-induced Precipitation  
10 Study (COPS): the scientific strategy, the field phase, and research highlights, *Quarterly Journal of the Royal Meteorological Society*, 137, 3–30, <https://doi.org/10.1002/qj.752>, 2011.
- Wulfmeyer, V., Turner, D. D., Baker, B., Banta, R., Behrendt, A., Bonin, T., Brewer, W. A., Buban, M., Choukulkar, A., Dumas, E., Hardesty, R. M., Heus, T., Ingwersen, J., Lange, D., Lee, T. R., Metzendorf, S., Muppa, S. K., Meyers, T., Newsom, R., Osman, M., Raasch, S., Santanello, J., Senff, C., Späth, F., Wagner, T., and Weckwerth, T.: A New Research Approach for Observing and Characterizing Land-  
15 Atmosphere Feedback, *Bulletin of the American Meteorological Society*, 99, 1639–1667, <https://doi.org/10.1175/BAMS-D-17-0009.1>, 2018.
- Zängl, G., Reinert, D., Rípodas, P., and Baldauf, M.: The ICON (ICOsahedral Non-hydrostatic) modelling framework of DWD and MPI-M: Description of the non-hydrostatic dynamical core, *Quarterly Journal of the Royal Meteorological Society*, 141, 563–579, <https://doi.org/10.1002/qj.2378>, 2015.
